# Supplementary material for: Silver-mediated radical cyclization: construction of Δ2-isoxazolines from α-halo ketoximes and 1,3-dicarbonyl compounds
Source: Royal Society of Chemistry journal article supplement (doi:10.1039/c4cc02084g), 2014-01-01

## Supplementary Information

# Silver-Mediated Radical Cyclization: Construction of $\Delta^2$ -Isoxazolines from $\alpha$ -Halo Ketoximes and 1,3-Dicarbonyl Compounds

*Yan-Yun Liu, Xu-Heng Yang, Ji Yang, Ren-Jie Song and Jin-Heng Li\**

*State Key Laboratory of Chemo/Biosensing and Chemometrics, College of Chemistry and  
Chemical Engineering, Hunan University, Changsha 410082, China, and State Key Laboratory of  
Applied Organic Chemistry Lanzhou University, Lanzhou 730000, China*

[jhli@hnu.edu.cn](mailto:jhli@hnu.edu.cn)

### List of Contents

**(A) General Experimental Procedure**

**(B) Analytical data for 3-5**

**(C) References**

**(D) Spectra**

## (A) General Experimental Procedure

### (a) Materias

Substrates **1a-1k** were prepared according to literature procedures.<sup>[1]</sup>

### (b) General Procedures for Silver-Mediated Synthesis of Isoxazolines **3**:

**Conditions A:** To a Schlenk tube were added  $\alpha$ -halo ketoxime **1** (0.3 mmol), 1,3-dicarbonyl compound **2** (**2a-2e**) (0.6 mmol),  $\text{Ag}_2\text{CO}_3$  (0.6 mmol),  $\text{K}_2\text{CO}_3$  (0.3 mmol) and DMA (3 mL). Then the tube was charged with argon, and was stirred at 50 °C for about 20 h until complete consumption of starting material as monitored by TLC and/or GC-MS analysis. After the reaction was finished, the reaction mixture was washed with brine. The aqueous phase was re-extracted with ethyl acetate. The combined organic extracts were dried over  $\text{Na}_2\text{SO}_4$ , concentrated in vacuum, and the resulting residue was purified by silica gel column chromatography (hexane/ethyl acetate = 20:1) to afford the desired product **3**.

**Conditions B:** To a Schlenk tube were added  $\alpha$ -halo ketoxime **1** (0.3 mmol), 1,3-dicarbonyl compound **2** (**2f-2q**) (0.6 mmol),  $\text{Ag}_2\text{CO}_3$  (0.6 mmol),  $\text{Cs}_2\text{CO}_3$  (0.3 mmol) and DMA (3 mL). Then the tube was charged with argon, and was stirred at 50 °C for about 20 h until complete consumption of starting material as monitored by TLC and/or GC-MS analysis. After the reaction was finished, the reaction mixture was washed with brine. The aqueous phase was re-extracted with ethyl acetate. The combined organic extracts were dried over  $\text{Na}_2\text{SO}_4$ , concentrated in vacuum, and the resulting residue was purified by silica gel column chromatography (hexane/ethyl acetate = 20:1) to afford the desired product **3**.

### (c) Table S1. Screening Optimizing Reaction Conditions

Table S1. Screening Optimal Conditions<sup>[a]</sup>

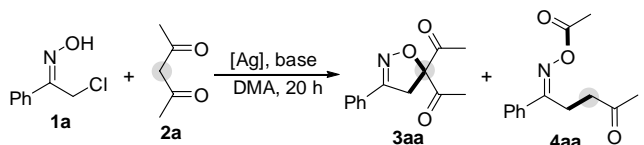

| Entry           | [M]<br>[equiv]                        | Base<br>[equiv]                     | Solvent | Isolated Yield [%] |       |
|-----------------|---------------------------------------|-------------------------------------|---------|--------------------|-------|
|                 |                                       |                                     |         | 3aa                | 4aa   |
| 1               | Ag <sub>2</sub> CO <sub>3</sub> (0.1) | K <sub>2</sub> CO <sub>3</sub> (1)  | DMA     | 9                  | trace |
| 2               | Ag <sub>2</sub> CO <sub>3</sub> (1)   | K <sub>2</sub> CO <sub>3</sub> (1)  | DMA     | 63                 | trace |
| 3               | Ag <sub>2</sub> CO <sub>3</sub> (2)   | K <sub>2</sub> CO <sub>3</sub> (1)  | DMA     | 80                 | trace |
| 4               | Ag <sub>2</sub> CO <sub>3</sub> (2.5) | K <sub>2</sub> CO <sub>3</sub> (1)  | DMA     | 79                 | trace |
| 5               | —                                     | K <sub>2</sub> CO <sub>3</sub> (1)  | DMA     | 0                  | 15    |
| 6               | Ag <sub>2</sub> CO <sub>3</sub> (2)   | K <sub>2</sub> CO <sub>3</sub> (2)  | DMA     | 50                 | trace |
| 7               | Ag <sub>2</sub> CO <sub>3</sub> (2)   | —                                   | DMA     | trace              | 0     |
| 8               | Ag <sub>2</sub> CO <sub>3</sub> (2)   | Cs <sub>2</sub> CO <sub>3</sub> (1) | DMA     | 16                 | trace |
| 9               | Ag <sub>2</sub> CO <sub>3</sub> (2)   | Na <sub>2</sub> CO <sub>3</sub> (1) | DMA     | 16                 | trace |
| 10              | Ag <sub>2</sub> CO <sub>3</sub> (2)   | KOAc (1)                            | DMA     | 44                 | trace |
| 11              | Ag <sub>2</sub> CO <sub>3</sub> (2)   | Et <sub>3</sub> N (1)               | DMA     | 15                 | trace |
| 12              | Ag <sub>2</sub> CO <sub>3</sub> (2)   | DABCO (1)                           | DMA     | 76                 | trace |
| 13              | Ag <sub>2</sub> CO <sub>3</sub> (2)   | K <sub>2</sub> CO <sub>3</sub> (1)  | DMF     | 41                 | trace |
| 14              | Ag <sub>2</sub> CO <sub>3</sub> (2)   | Cs <sub>2</sub> CO <sub>3</sub> (1) | DMSO    | 30                 | trace |
| 15              | Ag <sub>2</sub> CO <sub>3</sub> (2)   | Cs <sub>2</sub> CO <sub>3</sub> (1) | toluene | trace              | trace |
| 16              | AgNO <sub>3</sub> (2)                 | K <sub>2</sub> CO <sub>3</sub> (1)  | DMA     | 6                  | trace |
| 17              | AgOAc (2)                             | K <sub>2</sub> CO <sub>3</sub> (1)  | DMA     | 16                 | trace |
| 18              | Ag <sub>2</sub> O (2)                 | K <sub>2</sub> CO <sub>3</sub> (1)  | DMA     | 19                 | trace |
| 19 <sup>b</sup> | Ag <sub>2</sub> CO <sub>3</sub> (2)   | K <sub>2</sub> CO <sub>3</sub> (1)  | DMA     | 75                 | trace |
| 20              | Cu(OAc) <sub>2</sub> (2)              | K <sub>2</sub> CO <sub>3</sub> (1)  | DMA     | trace              | 15    |
| 21              | PhI(OAc) <sub>2</sub> (2)             | K <sub>2</sub> CO <sub>3</sub> (1)  | DMA     | trace              | trace |

<sup>a</sup> Reaction conditions: **1a** (0.3 mmol), **2a** (2 equiv), [M], base, and DMA (*N,N*-diethylacetamide, 3 mL) at room temperature under argon. <sup>b</sup> At 50 °C.

### (d) Scheme S1 Base-Mediated the Reaction of 2-Chloro-1-phenylethanone

#### Oxime (**1a**) with 1,3-Dicarbonyl compounds (**2**)

As shown in Scheme S1, the reaction of 2-chloro-1-phenylethanone oxime (**1a**) with 1,3-dicarbonyl compounds **2** in the presence of bases alone were performed to increasing the length of the carbon chain. The results in Table 1 indicated that only 15% yield of 5-(acetoxymino)-5-phenylpentan-2-one (**4aa**) was isolated from 2-chloro-1-phenylethanone oxime (**1a**) and pentane-2,4-dione (**2a**) in the presence of 1 equiv K<sub>2</sub>CO<sub>3</sub> (entry 5; Table 1). Thus, the effect of bases was screened, and the results demonstrated that Na<sub>2</sub>CO<sub>3</sub> was a preferred base in view of the yield, and the amount of Na<sub>2</sub>CO<sub>3</sub> was found to affect the yield (Eq 1): While the reaction afforded the desired product **4aa** in 40% yield at a loading of 1 equiv Na<sub>2</sub>CO<sub>3</sub>, the yield was increased from 40% to 60% at 2 equiv Na<sub>2</sub>CO<sub>3</sub> and to 58% using 3 equiv Na<sub>2</sub>CO<sub>3</sub>. 1,3-Diketones **2c** and **2d**, containing a or two phenyl groups adjacent to the carbonyl group, provided the corresponding products **4ac** and **4ad** in excellent yields. Using 3-keto ester **2o**, however, only nucleophilic replacement product **5ao** was obtained in the presence of Na<sub>2</sub>CO<sub>3</sub> or Cs<sub>2</sub>CO<sub>3</sub> (Eq 2).

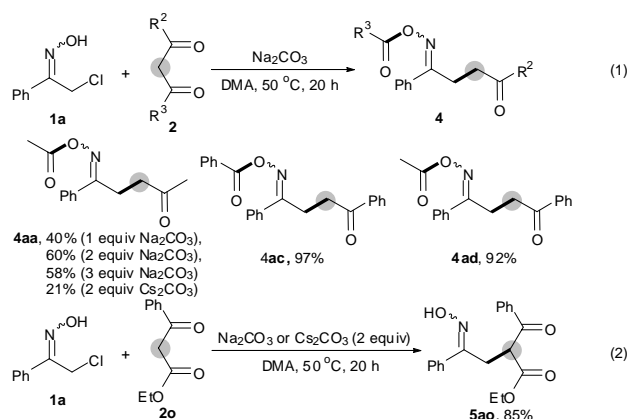

**Scheme S1** Base-Mediated the Reaction of 2-Chloro-1-phenylethanone Oxime (**1a**) with 1,3-Dicarbonyl compounds (**2**).

### (e) Scheme S2 Control Experiments

To elucidate the mechanism, some control experiments were carried out (Scheme S2). The results in Eq 3 showed that the reactivity of substrate **5ao** was rather lower using  $\text{Ag}_2\text{CO}_3$  alone. To our delight, substrate **5ao** could be readily converted to isoxazoline **3aa** in the presence of both  $\text{Ag}_2\text{CO}_3$  and  $\text{K}_2\text{CO}_3$  (94% yield). These suggest that substrate **5ao** may be an intermediate for this Ag-mediated transformation. Subsequently, two radical inhibitors, BHT (2,6-di-*tert*-butyl-4-methylphenol) and hydroquinone, were added to this Ag-mediated reaction (Eq 3): a stoichiometric amount of BHT (2 equiv) or hydroquinone (2 equiv) resulted in no conversion of substrate **5ao**. Identical results were observed from the reaction substrate **1a** and diketone **2a** in the presence of either BHT or hydroquinone (Eq 4). These results imply that this Ag-mediated transformation includes a radical process, and the generation of a radical at the 2 position of 1,3-dicarbonyl compounds can be triggered by  $\text{Ag}_2\text{CO}_3$ .<sup>8</sup>

Notably, the silver salts were recovered and reused among this current reaction (Eq 5).<sup>8e</sup> Excess  $\text{Ag}_2\text{CO}_3$  and all silver species were filtrated after the reaction and in turn treated with nitric acid and  $\text{Na}_2\text{CO}_3$  to recover fresh  $\text{Ag}_2\text{CO}_3$ . Interestingly, the fresh  $\text{Ag}_2\text{CO}_3$  was also efficient for this current reaction without loss of activity (Eq 5).

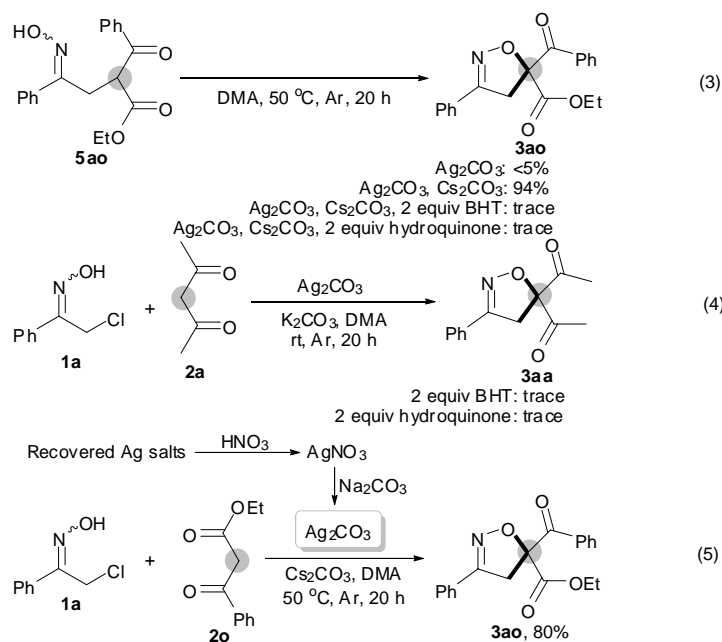

**Scheme S2** Control Experiments.

**(B) Analytical data for 3-5**

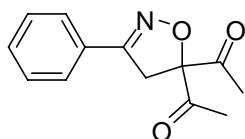

**1,1'-(3-phenyl-4,5-dihydroisoxazole-5,5-diyl)diethanone (3aa):**

White solid, mp 78.3-79.6 °C (uncorrected); <sup>1</sup>H NMR (400 MHz, CDCl<sub>3</sub>) δ: 7.67-7.64 (m, 2H), 7.47-7.39 (m, 3H), 3.78 (s, 2H), 2.36 (s, 6H); <sup>13</sup>C NMR (100 MHz, CDCl<sub>3</sub>) δ: 202.4, 156.6, 131.0, 128.9, 127.7, 126.9, 97.5, 40.1, 25.9; IR (KBr, cm<sup>-1</sup>): 1719, 1689; LRMS (EI, 70 eV) *m/z* (%): 231 (M<sup>+</sup>, 4), 189 (100), 160 (21), 118 (85); HRMS *m/z* (ESI) calcd for C<sub>13</sub>H<sub>14</sub>NO<sub>3</sub> (M+H)<sup>+</sup> 232.0968, found 232.0964.

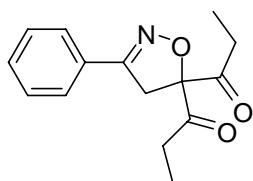

**1,1'-(3-phenyl-4,5-dihydroisoxazole-5,5-diyl)dipropan-1-one (3ab):**

White solid, mp 89.0-89.9 °C (uncorrected); <sup>1</sup>H NMR (400 MHz, CDCl<sub>3</sub>) δ: 7.67-7.64 (m, 2H), 7.46-7.38 (m, 3H), 3.78 (s, 2H), 2.84-2.64 (m, 4H), 1.09 (t, *J* = 7.2 Hz, 6H); <sup>13</sup>C NMR (100 MHz, CDCl<sub>3</sub>) δ: 205.4, 156.6, 130.9, 128.9, 127.9, 126.9, 97.7, 40.7, 31.7, 7.3; IR (KBr, cm<sup>-1</sup>): 1720, 1693; LRMS (EI, 70 eV) *m/z* (%): 259 (M<sup>+</sup>, 1), 203 (20), 146 (18), 57 (100); HRMS *m/z* (ESI) calcd for C<sub>15</sub>H<sub>18</sub>NO<sub>3</sub> (M+H)<sup>+</sup> 260.1281, found 260.1282.

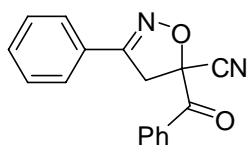

**5-benzoyl-3-phenyl-4,5-dihydroisoxazole-5-carbonitrile (3ae):**

White solid, mp 102.2-103.5 °C (uncorrected);  $^1\text{H}$  NMR (400 MHz,  $\text{CDCl}_3$ )  $\delta$ : 8.28-8.26 (m, 2H), 7.71-7.68 (m, 3H), 7.56 (t,  $J = 8.0$  Hz, 2H), 7.52-7.43 (m, 3H), 4.65 (d,  $J = 17.2$  Hz, 1H), 3.92 (d,  $J = 17.6$  Hz, 1H);  $^{13}\text{C}$  NMR (100 MHz,  $\text{CDCl}_3$ )  $\delta$ : 185.2, 156.8, 135.1, 131.4, 130.7, 128.9, 127.2, 126.9, 116.9, 81.5, 43.7; IR (KBr,  $\text{cm}^{-1}$ ): 1691; LRMS (EI, 70 eV)  $m/z$  (%): 276 ( $\text{M}^+$ , 1), 249 (2), 221 (2), 105 (100); HRMS  $m/z$  (ESI) calcd for  $\text{C}_{17}\text{H}_{13}\text{N}_2\text{O}_2$  ( $\text{M}+\text{H}$ ) $^+$  277.0972, found 277.0983.

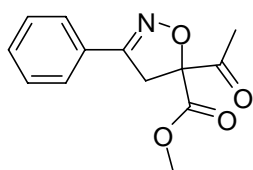

**5-acetyl-3-phenyl-4,5-dihydroisoxazole-5-carboxylic acid methyl ester (3af):**

Colorless oil;  $^1\text{H}$  NMR (400 MHz,  $\text{CDCl}_3$ )  $\delta$ : 7.67-7.64 (m, 2H), 7.46-7.38 (m, 3H), 3.94-3.83 (m, 5H), 2.42 (s, 3H);  $^{13}\text{C}$  NMR (100 MHz,  $\text{CDCl}_3$ )  $\delta$ : 202.4, 167.9, 156.5, 130.8, 128.8, 127.8, 126.9, 92.6, 53.6, 40.9, 25.8; IR (KBr,  $\text{cm}^{-1}$ ): 1751, 1695; LRMS (EI, 70 eV)  $m/z$  (%): 247 ( $\text{M}^+$ , 4), 188 (46), 177 (36), 144 (100); HRMS  $m/z$  (ESI) calcd for  $\text{C}_{13}\text{H}_{14}\text{NO}_4$  ( $\text{M}+\text{H}$ ) $^+$  248.0917, found 248.0909.

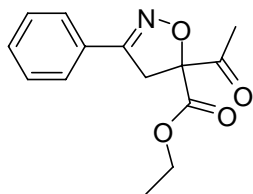

**5-acetyl-3-phenyl-4,5-dihydroisoxazole-5-carboxylic acid ethyl ester (3ag):**

Colorless oil;  $^1\text{H}$  NMR (400 MHz,  $\text{CDCl}_3$ )  $\delta$ : 7.67-7.64 (m, 2H), 7.45-7.38 (m, 3H), 4.32-4.27 (m, 2H), 3.94-3.81 (m, 2H), 2.42 (s, 3H), 1.31 (t,  $J = 7.2$  Hz, 3H);  $^{13}\text{C}$  NMR (100 MHz,  $\text{CDCl}_3$ )  $\delta$ : 202.5, 167.3, 156.5, 130.8, 128.8, 127.9, 126.9, 92.7, 62.9, 40.8, 25.8, 13.9; IR (KBr,  $\text{cm}^{-1}$ ): 1749, 1698; LRMS (EI, 70 eV)  $m/z$  (%): 261

(M<sup>+</sup>, 3), 176 (7), 162 (14), 144 (100); HRMS *m/z* (ESI) calcd for C<sub>14</sub>H<sub>16</sub>NO<sub>4</sub> (M+H)<sup>+</sup> 262.1074, found 262.1083.

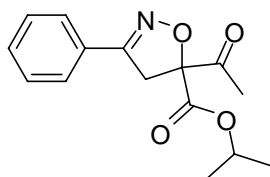

**5-acetyl-3-phenyl-4,5-dihydroisoxazole-5-carboxylic acid isopropyl ester (3ah):**

Colorless oil; <sup>1</sup>H NMR (400 MHz, CDCl<sub>3</sub>) δ: 7.66-7.64 (m, 2H), 7.44-7.37 (m, 3H), 5.15-5.08 (m, 1H), 3.93-3.77 (m, 2H), 2.41 (s, 3H), 1.29 (t, *J* = 6.0 Hz, 6H); <sup>13</sup>C NMR (100 MHz, CDCl<sub>3</sub>) δ: 202.4, 166.8, 156.4, 130.7, 128.8, 128.0, 126.9, 92.8, 71.0, 40.6, 25.7, 21.4 (2C); IR (KBr, cm<sup>-1</sup>): 1754, 1693; LRMS (EI, 70 eV) *m/z* (%): 275 (M<sup>+</sup>, 3), 188 (50), 160 (18), 144 (100); HRMS *m/z* (ESI) calcd for C<sub>15</sub>H<sub>18</sub>NO<sub>4</sub> (M+H)<sup>+</sup> 276.1230, found 276.1243.

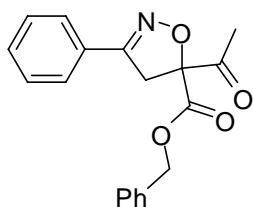

**5-acetyl-3-phenyl-4,5-dihydroisoxazole-5-carboxylic acid benzyl ester (3ai):**

Colorless oil; <sup>1</sup>H NMR (400 MHz, CDCl<sub>3</sub>) δ: 7.67-7.64 (m, 2H), 7.44-7.34 (m, 8H), 5.27 (s, 2H), 3.96-3.82 (m, 2H), 2.38 (s, 3H); <sup>13</sup>C NMR (100 MHz, CDCl<sub>3</sub>) δ: 202.2, 167.2, 156.5, 134.5, 130.8, 128.8, 128.6 (2C), 128.3, 128.2, 126.9, 92.7, 68.3, 40.8, 25.8; IR (KBr, cm<sup>-1</sup>): 1746, 1688; LRMS (EI, 70 eV) *m/z* (%): 323 (M<sup>+</sup>, 1), 236 (8), 188 (15), 91 (100); HRMS *m/z* (ESI) calcd for C<sub>19</sub>H<sub>18</sub>NO<sub>4</sub> (M+H)<sup>+</sup> 324.1230, found 324.1256.

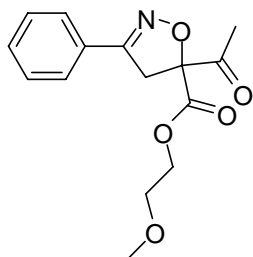

**5-acetyl-3-phenyl-4,5-dihydroisoxazole-5-carboxylic acid 2-methoxyethyl ester**

**(3aj):**

Colorless oil;  $^1\text{H}$  NMR (400 MHz,  $\text{CDCl}_3$ )  $\delta$ : 7.65-7.63 (m, 2H), 7.44-7.36 (m, 3H), 4.38-4.36 (m, 2H), 3.97-3.78 (m, 2H), 3.60-3.58 (m, 2H), 3.33 (s, 3H), 2.41 (s, 3H);  $^{13}\text{C}$  NMR (100 MHz,  $\text{CDCl}_3$ )  $\delta$ : 201.6, 167.4, 156.4, 130.8, 128.8, 127.9, 126.9, 92.5, 69.7, 65.4, 58.8, 40.6, 25.6; IR (KBr,  $\text{cm}^{-1}$ ): 1756, 1696; LRMS (EI, 70 eV)  $m/z$  (%): 291 ( $\text{M}^+$ , 1), 221 (5), 188 (64), 144 (100); HRMS  $m/z$  (ESI) calcd for  $\text{C}_{15}\text{H}_{18}\text{NO}_5$  ( $\text{M}+\text{H}$ ) $^+$  292.1179, found 292.1190.

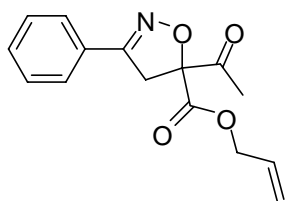

**5-acetyl-3-phenyl-4,5-dihydroisoxazole-5-carboxylic acid allyl ester (3ak):**

Colorless oil;  $^1\text{H}$  NMR (400 MHz,  $\text{CDCl}_3$ )  $\delta$ : 7.66-7.64 (m, 2H), 7.45-7.37 (m, 3H), 5.95-5.85 (m, 1H), 5.37-5.26 (m, 2H), 4.72 (d,  $J = 5.6$  Hz, 2H), 3.94-3.83 (m, 2H), 2.42 (s, 3H);  $^{13}\text{C}$  NMR (100 MHz,  $\text{CDCl}_3$ )  $\delta$ : 202.4, 167.0, 156.5, 130.8, 130.6, 128.8, 127.9, 126.9, 119.6, 92.7, 67.1, 40.8, 25.8.; IR (KBr,  $\text{cm}^{-1}$ ): 1749, 1690; LRMS (EI, 70 eV)  $m/z$  (%): 273 ( $\text{M}^+$ , 3), 202(6), 188 (50), 144 (100); HRMS  $m/z$  (ESI) calcd for  $\text{C}_{15}\text{H}_{16}\text{NO}_4$  ( $\text{M}+\text{H}$ ) $^+$  274.1074, found 274.1082.



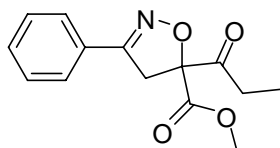

**3-phenyl-5-propionyl-4,5-dihydroisoxazole-5-carboxylic acid methyl ester (3al):**

Colorless oil;  $^1\text{H}$  NMR (400 MHz,  $\text{CDCl}_3$ )  $\delta$ : 7.65-7.64 (m, 2H), 7.45-7.37 (m, 3H), 3.89 (s, 2H), 3.83 (s, 3H), 2.85-2.80 (m, 2H), 1.09 (t,  $J = 7.2$  Hz, 3H);  $^{13}\text{C}$  NMR (100 MHz,  $\text{CDCl}_3$ )  $\delta$ : 205.4, 168.0, 156.5, 130.8, 128.8, 127.9, 126.9, 92.6, 53.6, 41.3, 31.5, 7.2; IR (KBr,  $\text{cm}^{-1}$ ): 1756, 1694; LRMS (EI, 70 eV)  $m/z$  (%): 261 ( $\text{M}^+$ , 1), 202 (10), 144 (16), 57 (100); HRMS  $m/z$  (ESI) calcd for  $\text{C}_{14}\text{H}_{16}\text{NO}_4$  ( $\text{M}+\text{H}$ ) $^+$  262.1074, found 262.1083.

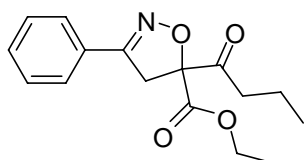

**5-buteryl-3-phenyl-4,5-dihydroisoxazole-5-carboxylic acid ethyl ester (3am):**

Colorless oil;  $^1\text{H}$  NMR (400 MHz,  $\text{CDCl}_3$ )  $\delta$ : 7.67-7.65 (m, 2H), 7.45-7.38 (m, 3H), 4.31-4.26 (m, 2H), 3.93-3.82 (m, 2H), 2.77 (t,  $J = 7.2$  Hz, 2H), 1.67-1.61 (m, 2H), 1.30 (t,  $J = 7.2$  Hz, 3H), 0.92 (t,  $J = 7.6$  Hz, 3H);  $^{13}\text{C}$  NMR (100 MHz,  $\text{CDCl}_3$ )  $\delta$ : 204.8, 167.5, 156.5, 130.8, 128.8, 128.0, 126.9, 92.8, 62.9, 41.0, 39.9, 16.6, 13.9, 13.4; IR (KBr,  $\text{cm}^{-1}$ ): 1750, 1689; LRMS (EI, 70 eV)  $m/z$  (%): 289 ( $\text{M}^+$ , 1), 216 (12), 144 (16), 71 (100); HRMS  $m/z$  (ESI) calcd for  $\text{C}_{16}\text{H}_{20}\text{NO}_4$  ( $\text{M}+\text{H}$ ) $^+$  290.1387, found 290.1396.

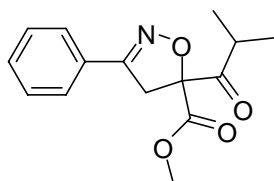

**5-isobutyryl-3-phenyl-4,5-dihydroisoxazole-5-carboxylic acid methyl ester (3an):**

Colorless oil;  $^1\text{H}$  NMR (400 MHz,  $\text{CDCl}_3$ )  $\delta$ : 7.68-7.65 (m, 2H), 7.46-7.38 (m, 3H), 3.89 (s, 2H), 3.83 (s, 3H), 3.32-3.25 (m, 1H), 1.18 (d,  $J = 6.8$  Hz, 3H), 1.11 (d,  $J = 6.8$  Hz, 3H);  $^{13}\text{C}$  NMR (100 MHz,  $\text{CDCl}_3$ )  $\delta$ : 208.9, 168.2, 156.5, 130.8, 128.8, 127.9, 127.0, 92.7, 53.5, 41.8, 36.8, 18.9, 18.7; IR (KBr,  $\text{cm}^{-1}$ ): 1752, 1697; LRMS (EI, 70 eV)  $m/z$  (%): 275 ( $\text{M}^+$ , 1), 232 (42), 172 (70), 71 (100); HRMS  $m/z$  (ESI) calcd for  $\text{C}_{15}\text{H}_{18}\text{NO}_4$  ( $\text{M}+\text{H}$ ) $^+$  276.1230, found 276.1242.

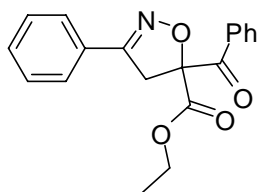

**5-benzoyl-3-phenyl-4,5-dihydroisoxazole-5-carboxylic acid ethyl ester (3ao):**<sup>12l</sup>

Colorless oil;  $^1\text{H}$  NMR (400 MHz,  $\text{CDCl}_3$ )  $\delta$ : 8.14-8.12 (m, 2H), 7.71-7.69 (m, 2H), 7.61-7.57 (m, 1H), 7.49-7.38 (m, 5H), 4.56 (d,  $J = 17.6$  Hz, 1H), 4.26-4.21 (m, 2H), 3.72 (d,  $J = 17.6$  Hz, 1H), 1.15 (t,  $J = 7.2$  Hz, 3H);  $^{13}\text{C}$  NMR (100 MHz,  $\text{CDCl}_3$ )  $\delta$ : 189.9, 169.0, 156.1, 133.9, 133.3, 130.7, 130.0, 128.7, 128.6, 128.0, 127.0, 91.9, 62.7, 42.1, 13.7; LRMS (EI, 70 eV)  $m/z$  (%): 323 ( $\text{M}^+$ , 1), 250 (88), 190 (18), 105 (100).

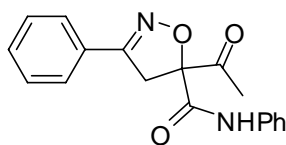

**5-acetyl-N,3-diphenyl-4,5-dihydroisoxazole-5-carboxamide (3ap):**

Pale yellow solid, mp 149.2-150.7  $^{\circ}\text{C}$  (uncorrected);  $^1\text{H}$  NMR (400 MHz,  $\text{CDCl}_3$ )  $\delta$ : 8.76 (s, 1H), 7.67-7.60 (m, 4H), 7.48-7.34 (m, 5H), 7.17 (t,  $J = 7.6$  Hz, 1H), 4.29 (d,  $J = 17.6$  Hz, 1H), 3.72 (d,  $J = 18$  Hz, 1H), 2.41 (s, 3H);  $^{13}\text{C}$  NMR (100 MHz,  $\text{CDCl}_3$ )  $\delta$ : 197.6, 166.3, 158.0, 136.4, 131.2, 129.1, 128.9, 127.1, 125.3, 119.9, 93.1,

40.8, 25.3; IR (KBr,  $\text{cm}^{-1}$ ): 1730, 1681; LRMS (EI, 70 eV)  $m/z$  (%): 308 ( $\text{M}^+$ , 1), 207 (18), 188 (89), 146 (100); HRMS  $m/z$  (ESI) calcd for  $\text{C}_{18}\text{H}_{17}\text{N}_2\text{O}_3$  ( $\text{M}+\text{H}$ ) $^+$  309.1234, found 309.1230.

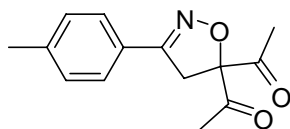

**1,1'-(3-*p*-tolyl-4,5-dihydroisoxazole-5,5-diyl)diethanone (3ca):**

White solid, mp 74.6-75.9 °C (uncorrected);  $^1\text{H}$  NMR (400 MHz,  $\text{CDCl}_3$ )  $\delta$ : 7.54 (d,  $J = 6.4$  Hz, 2H), 7.21 (d,  $J = 6.8$  Hz, 2H), 3.75 (s, 2H), 2.37 (s, 3H), 2.35 (s, 6H);  $^{13}\text{C}$  NMR (100 MHz,  $\text{CDCl}_3$ )  $\delta$ : 202.5, 156.5, 141.3, 129.5, 126.9, 124.9, 97.4, 40.2, 25.7, 21.4; IR (KBr,  $\text{cm}^{-1}$ ): 1720, 1687; LRMS (EI, 70 eV)  $m/z$  (%): 245 ( $\text{M}^+$ , 12), 203 (75), 160 (52), 132 (100); HRMS  $m/z$  (ESI) calcd for  $\text{C}_{14}\text{H}_{16}\text{NO}_3$  ( $\text{M}+\text{H}$ ) $^+$  246.1125, found 246.1142.

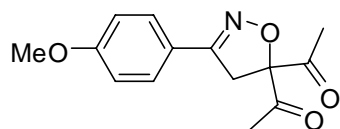

**1,1'-(3-(4-methoxyphenyl)-4,5-dihydroisoxazole-5,5-diyl)diethanone (3da):**

White solid, mp 88.9-90.1 °C (uncorrected);  $^1\text{H}$  NMR (400 MHz,  $\text{CDCl}_3$ )  $\delta$ : 7.60-7.56 (m, 2H), 6.93-6.89 (m, 2H), 3.82 (s, 3H), 3.73 (s, 2H), 2.34 (s, 6H);  $^{13}\text{C}$  NMR (100 MHz,  $\text{CDCl}_3$ )  $\delta$ : 202.6, 161.6, 156.1, 128.6, 120.2, 114.2, 97.3, 55.3, 40.3, 25.8; IR (KBr,  $\text{cm}^{-1}$ ): 1717, 1690; LRMS (EI, 70 eV)  $m/z$  (%): 261 ( $\text{M}^+$ , 29), 219 (42), 176 (49), 148 (100); HRMS  $m/z$  (ESI) calcd for  $\text{C}_{14}\text{H}_{16}\text{NO}_4$  ( $\text{M}+\text{H}$ ) $^+$  262.1074, found 262.1083.

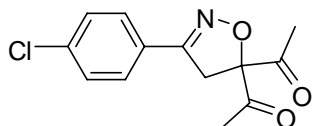

**1,1'-(3-(4-chlorophenyl)-4,5-dihydroisoxazole-5,5-diyl)diethanone (3ea):**

White solid, mp 78.4-79.6 °C (uncorrected); <sup>1</sup>H NMR (400 MHz, CDCl<sub>3</sub>) δ: 7.58 (d, *J* = 8.4 Hz, 2H), 7.38 (d, *J* = 8.4 Hz, 2H), 3.73 (s, 2H), 2.35 (s, 6H); <sup>13</sup>C NMR (100 MHz, CDCl<sub>3</sub>) δ: 202.1, 155.7, 137.0, 129.2, 128.2, 126.3, 97.8, 39.8, 25.8; IR (KBr, cm<sup>-1</sup>): 1719, 1688; LRMS (EI, 70 eV) *m/z* (%): 267 (M<sup>+</sup>+2, 3), 265 (M<sup>+</sup>, 9), 222 (100), 180 (63); HRMS *m/z* (ESI) calcd for C<sub>13</sub>H<sub>13</sub>ClNO<sub>3</sub> (M+H)<sup>+</sup> 266.0578, found 266.0586.

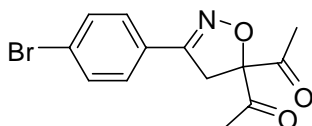

**1,1'-(3-(4-bromophenyl)-4,5-dihydroisoxazole-5,5-diyl)diethanone (3fa):**

White solid, mp 97.1-98.1 °C (uncorrected); <sup>1</sup>H NMR (400 MHz, CDCl<sub>3</sub>) δ: 7.62-7.47 (m, 4H), 3.73 (s, 2H), 2.35 (s, 6H); <sup>13</sup>C NMR (100 MHz, CDCl<sub>3</sub>) δ: 202.1, 155.8, 132.1, 128.3, 126.7, 125.3, 97.8, 39.8, 25.8; IR (KBr, cm<sup>-1</sup>): 1718, 1688; LRMS (EI, 70 eV) *m/z* (%): 311 (M<sup>+</sup>+2, 10), 309 (M<sup>+</sup>, 11), 267 (100), 226 (47); HRMS *m/z* (ESI) calcd for C<sub>13</sub>H<sub>13</sub>BrNO<sub>3</sub> (M+H)<sup>+</sup> 310.0073, found 310.0076.

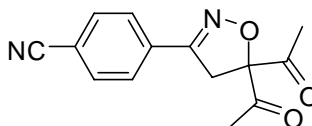

**4-(5,5-diacetyl-4,5-dihydroisoxazol-3-yl)benzonitrile (3ga):**

White solid, mp 128.5-129.5 °C (uncorrected); <sup>1</sup>H NMR (400 MHz, CDCl<sub>3</sub>) δ: 7.77-7.69 (m, 4H), 3.76 (s, 2H), 2.36 (s, 6H); <sup>13</sup>C NMR (100 MHz, CDCl<sub>3</sub>) δ: 201.6,

155.4, 132.6, 132.0, 127.4, 117.9, 114.2, 98.3, 39.3, 25.8; IR (KBr,  $\text{cm}^{-1}$ ): 1721, 1689; LRMS (EI, 70 eV)  $m/z$  (%): 256 ( $\text{M}^+$ , 1), 214 (100), 186 (45), 171 (63); HRMS  $m/z$  (ESI) calcd for  $\text{C}_{14}\text{H}_{13}\text{N}_2\text{O}_3$  ( $\text{M}+\text{H}$ )<sup>+</sup> 257.0921, found 257.0921.

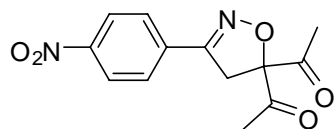

**1,1'-(3-(4-nitrophenyl)-4,5-dihydroisoxazole-5,5-diyl)diethanone (3ha):**

White solid; mp 138.0-139.7 °C (uncorrected); <sup>1</sup>H NMR (400 MHz,  $\text{CDCl}_3$ )  $\delta$ : 8.24 (d,  $J = 8.8$  Hz, 2H), 7.83 (d,  $J = 8.8$  Hz, 2H), 3.80 (s, 2H), 2.36 (s, 6H); <sup>13</sup>C NMR (100 MHz,  $\text{CDCl}_3$ )  $\delta$ : 201.5, 155.1, 148.8, 133.8, 127.8, 124.0, 98.4, 39.4, 25.8; IR (KBr,  $\text{cm}^{-1}$ ): 1722, 1687; LRMS (EI, 70 eV)  $m/z$  (%): 276 ( $\text{M}^+$ , 1), 234 (100), 206 (43), 191 (44); HRMS  $m/z$  (ESI) calcd for  $\text{C}_{13}\text{H}_{13}\text{N}_2\text{O}_5$  ( $\text{M}+\text{H}$ )<sup>+</sup> 277.0819, found 277.0823.

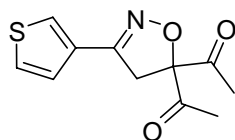

**1,1'-(3-(thiophen-3-yl)-4,5-dihydroisoxazole-5,5-diyl)diethanone (3ia):**

White solid; mp 109.6-110.4 °C (uncorrected); <sup>1</sup>H NMR (400 MHz,  $\text{CDCl}_3$ )  $\delta$ : 7.53-7.52 (m, 1H), 7.46-7.44 (m, 1H), 7.39-7.37 (m, 1H), 3.74 (s, 2H), 2.35 (s, 6H); <sup>13</sup>C NMR (100 MHz,  $\text{CDCl}_3$ )  $\delta$ : 202.3, 152.6, 129.4, 127.3, 127.0, 125.4, 97.2, 40.7, 25.8; IR (KBr,  $\text{cm}^{-1}$ ): 1717, 1686; LRMS (EI, 70 eV)  $m/z$  (%): 237 ( $\text{M}^+$ , 10), 195 (100), 166 (16), 152 (55); HRMS  $m/z$  (ESI) calcd for  $\text{C}_{11}\text{H}_{12}\text{NO}_3\text{S}$  ( $\text{M}+\text{H}$ )<sup>+</sup> 238.0532, found 238.0538.

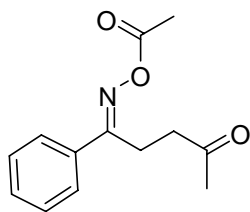

**(E)-5-(acetoxylimino)-5-phenylpentan-2-one (4aa):**

Colorless oil;  $^1\text{H}$  NMR (400 MHz,  $\text{CDCl}_3$ )  $\delta$ : 7.67 (d,  $J = 7.2$  Hz, 2H), 7.44-7.38 (m, 3H), 3.09 (t,  $J = 8.0$  Hz, 2H), 2.68 (t,  $J = 8.0$  Hz, 2H), 2.25 (s, 3H), 2.14 (s, 3H);  $^{13}\text{C}$  NMR (100 MHz,  $\text{CDCl}_3$ )  $\delta$ : 206.1, 168.9, 165.3, 133.3, 130.7, 128.7, 127.2, 39.7, 29.8, 22.1, 19.8; IR (KBr,  $\text{cm}^{-1}$ ): 1763, 1698; HRMS  $m/z$  (ESI) calcd for  $\text{C}_{13}\text{H}_{16}\text{NO}_3$  ( $\text{M}+\text{H}$ ) $^+$  234.1125, found 234.1127.

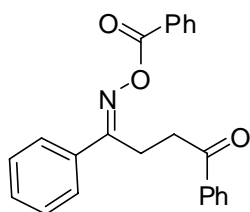

**(E)-4-(benzoyloxyimino)-1,4-diphenylbutan-1-one (4ac):**

White solid, mp 92.3-93.4  $^{\circ}\text{C}$  (uncorrected);  $^1\text{H}$  NMR (400 MHz,  $\text{CDCl}_3$ )  $\delta$ : 8.09-8.07 (m, 2H), 7.94-7.91 (m, 2H), 7.85-7.83 (m, 2H), 7.61-7.54 (m, 2H), 7.50-7.41 (m, 7H), 3.46-3.42 (m, 2H), 3.34-3.30 (m, 2H);  $^{13}\text{C}$  NMR (100 MHz,  $\text{CDCl}_3$ )  $\delta$ : 197.6, 166.5, 163.7, 136.1, 133.5, 133.4, 130.9, 129.6, 128.8 (2C), 128.7, 128.6, 128.0, 127.3, 35.2, 22.9; IR (KBr,  $\text{cm}^{-1}$ ): 1727, 1677; HRMS  $m/z$  (ESI) calcd for  $\text{C}_{23}\text{H}_{20}\text{NO}_3$  ( $\text{M}+\text{H}$ ) $^+$  358.1438, found 358.1434.

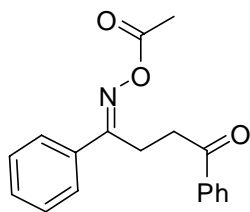

**(E)-4-(acetoxyimino)-1,4-diphenylbutan-1-one (4ad):**

White solid, mp 80.4-81.6 °C (uncorrected); <sup>1</sup>H NMR (400 MHz, CDCl<sub>3</sub>) δ: 7.92 (d, *J* = 7.6 Hz, 2H), 7.75 (d, *J* = 6.8 Hz, 2H), 7.55 (t, *J* = 7.6 Hz, 1H), 7.46-7.38 (m, 5H), 3.30-3.20 (m, 4H), 2.23 (s, 3H); <sup>13</sup>C NMR (100 MHz, CDCl<sub>3</sub>) δ: 197.5, 168.7, 165.4, 136.2, 133.4, 133.3, 130.7, 128.7, 128.6, 127.9, 127.2, 35.1, 22.7, 19.7; IR (KBr, cm<sup>-1</sup>): 1758, 1681; HRMS *m/z* (ESI) calcd for C<sub>18</sub>H<sub>18</sub>NO<sub>3</sub> (M+H)<sup>+</sup> 296.1281, found 296.1273.

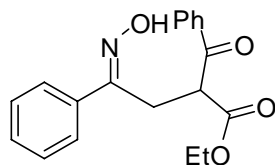

**(E)-ethyl 2-benzoyl-4-(hydroxyimino)-4-phenylbutanoate (5ao):**

Colorless oil; <sup>1</sup>H NMR (400 MHz, CDCl<sub>3</sub>) δ: 9.63 (s, 1H), 7.94 (d, *J* = 7.6 Hz, 2H), 7.59-7.52 (m, 3H), 7.43-7.32 (m, 5H), 4.96 (t, *J* = 7.6 Hz, 1H), 3.98-3.92 (m, 2H), 3.51-3.40 (m, 2H), 1.01 (t, *J* = 7.2 Hz, 3H); <sup>13</sup>C NMR (100 MHz, CDCl<sub>3</sub>) δ: 194.6, 169.3, 157.0, 135.8, 135.2, 133.6, 129.4, 128.6 (2C), 128.5, 126.6, 61.6, 50.5, 26.4, 13.6.

**(C) Reference**

- 1 (a) J. M. Hatcher, M. C. Kohler and D. M. Coltart, *Org. Lett.*, 2011, **13**, 3810; (b) T. C. Wabnitz, S. Saaby and K. A. Jørgensen, *Org. Biomol. Chem.*, 2004, **2**, 828; (c) V. Pavlishchuk, F. Birkelbach, T. Weyhermuller, K. Wieghardt and P. Chaudhuri, *Inorg. Chem.*, 2002, **41**, 4405; (d) S. K. Boyer, R. A. Pfund, R. E. Portmann, G. H. Sedelmeier and H. F. Wetter, *Helv. Chim. Acta.*, 1988, **71**, 337.

2 M. Yamauchi, *J. Heterocyclic Chem.*, 2002, **39**, 1013.



## (D) Spectra

### 1,1'-(3-phenyl-4,5-dihydroisoxazole-5,5-diyl)diethanone (3aa):

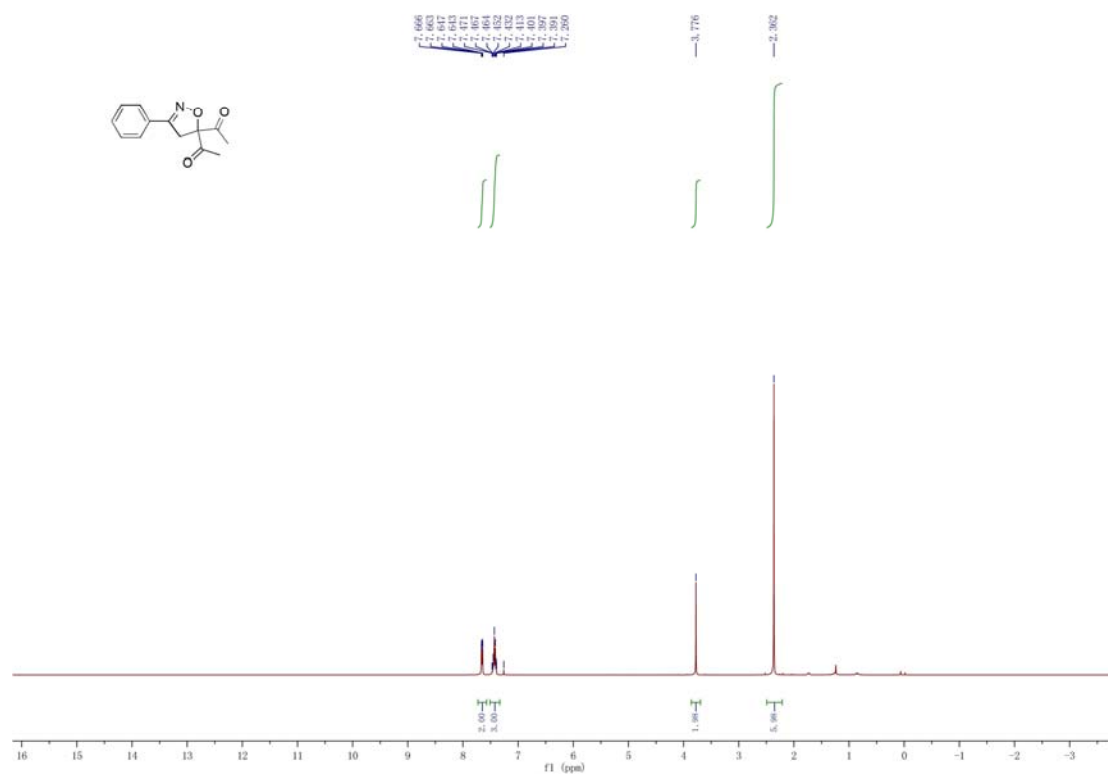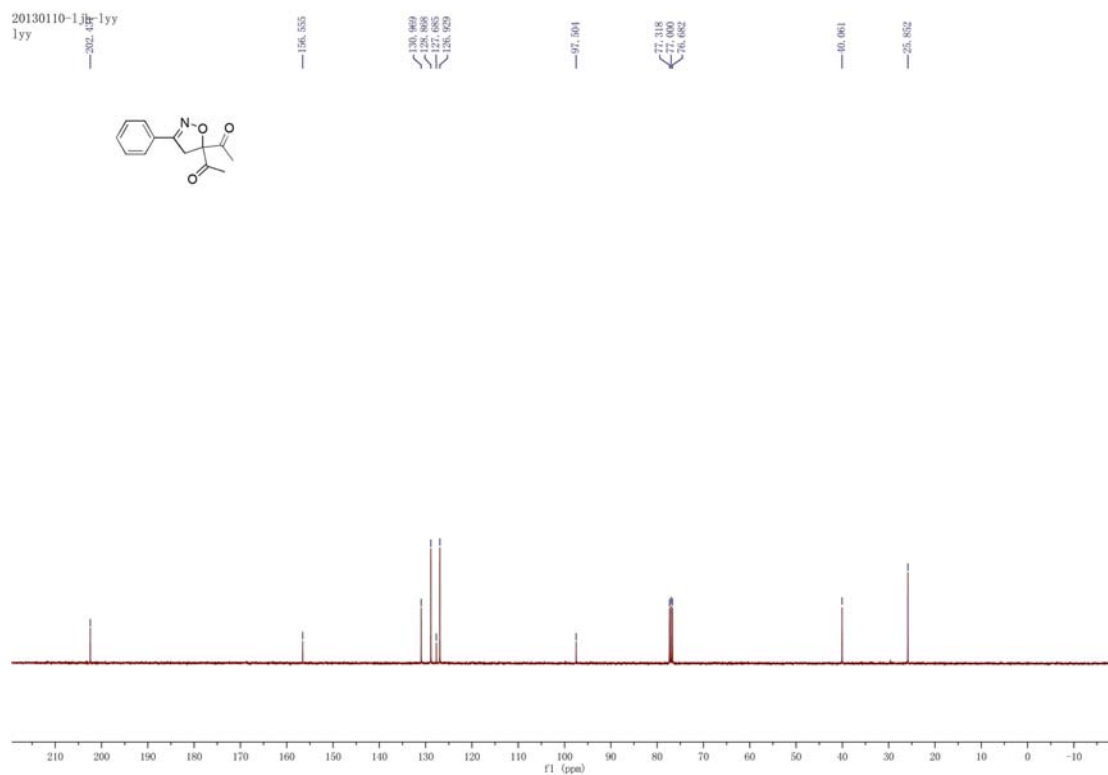



### 5-benzoyl-3-phenyl-4,5-dihydroisoxazole-5-carbonitrile (3ae):

20130406-1jh-lyy-09  
lyy-09

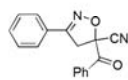

8.279  
8.258  
7.707  
7.690  
7.686  
7.681  
7.677  
7.581  
7.560  
7.550  
7.549  
7.503  
7.482  
7.478  
7.470  
7.451  
7.439  
7.430  
7.420  
4.626  
3.941  
3.907

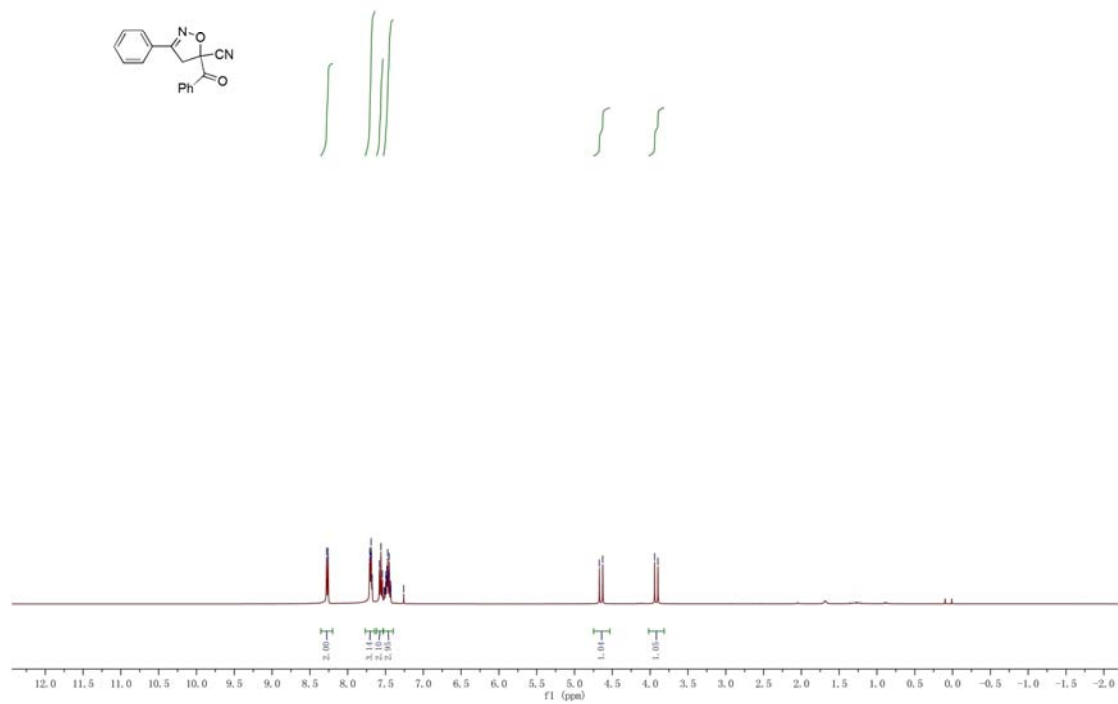

20130406-1jh-lyy-09  
lyy-09

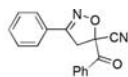

185.153

156.760

135.080

131.427

128.879

128.494

128.859

127.108

126.907

116.905

81.544

77.317

77.000

76.852

43.691

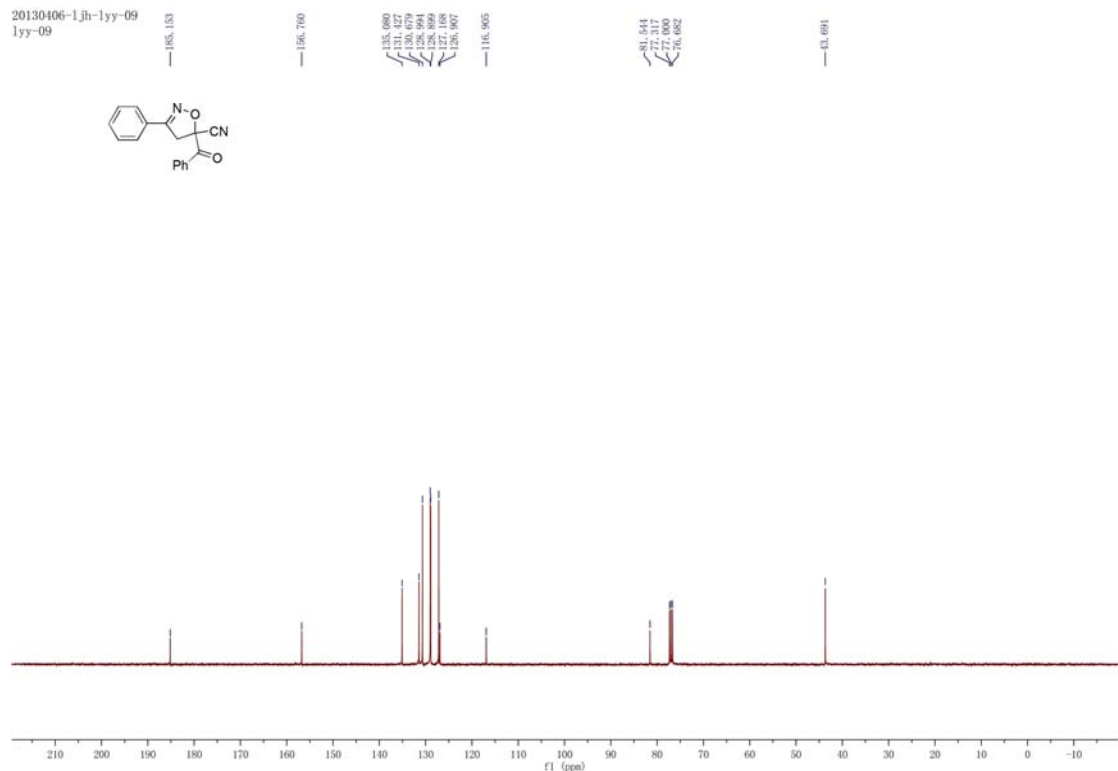

### 5-acetyl-3-phenyl-4,5-dihydroisoxazole-5-carboxylic acid methyl ester (3af):

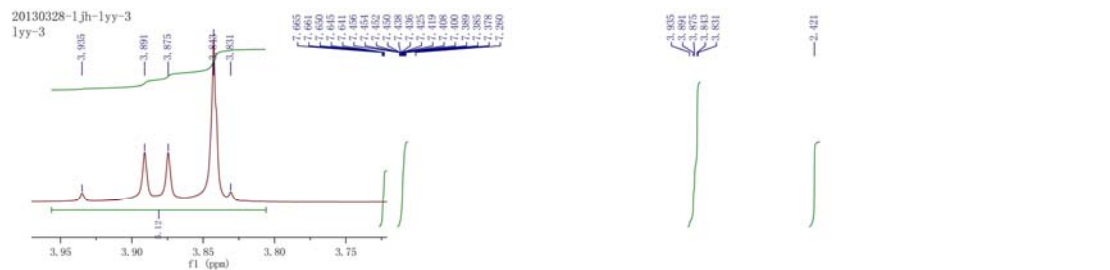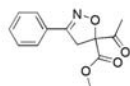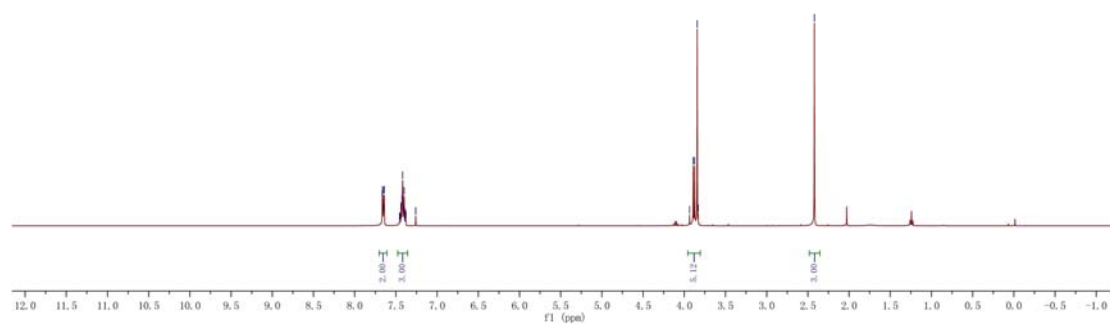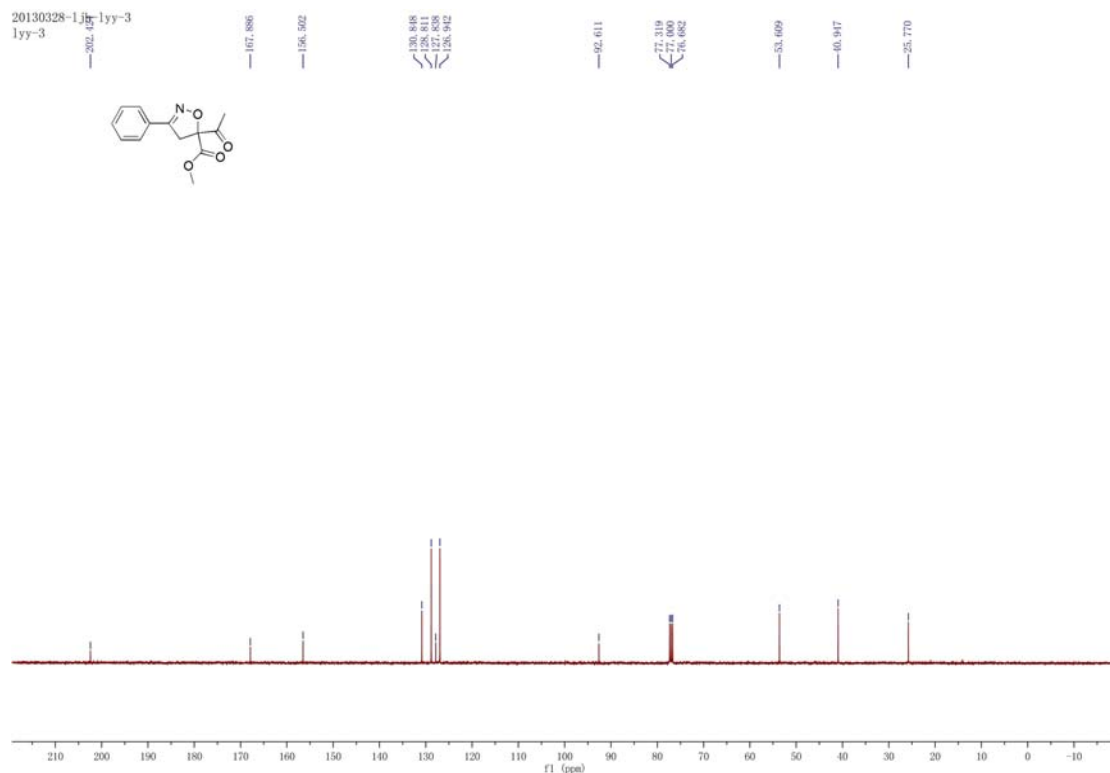

### 5-acetyl-3-phenyl-4,5-dihydroisoxazole-5-carboxylic acid ethyl ester (3ag):

20130328-1jh-lyy-4  
lyy-4

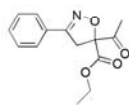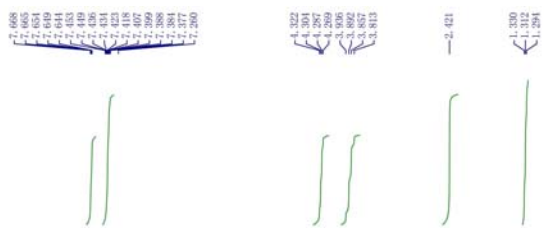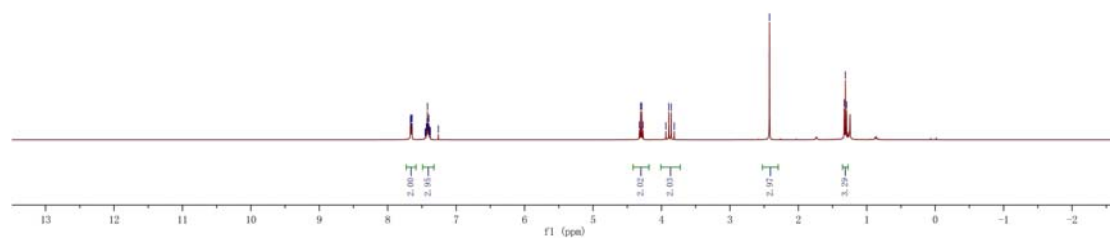

20130328-1jh-lyy-4  
lyy-4

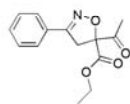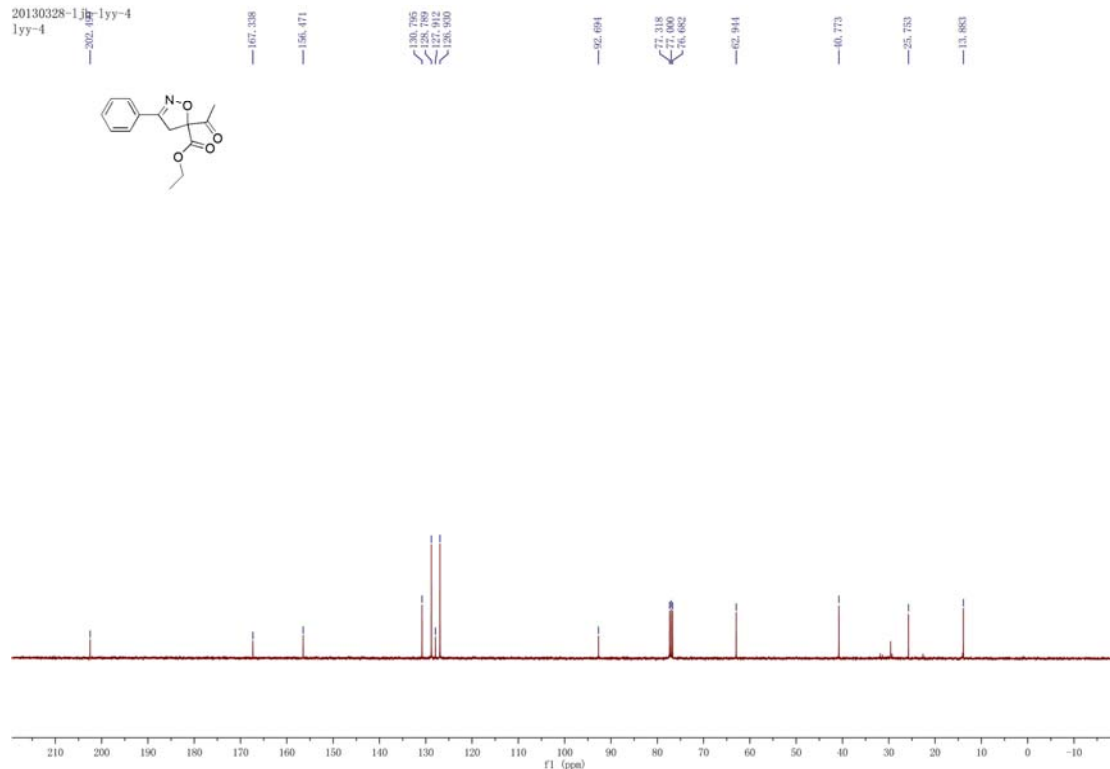

### 5-acetyl-3-phenyl-4,5-dihydroisoxazole-5-carboxylic acid isopropyl ester (3ah):

20130314-1.jh-lyy-01  
lyy-01

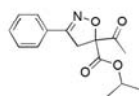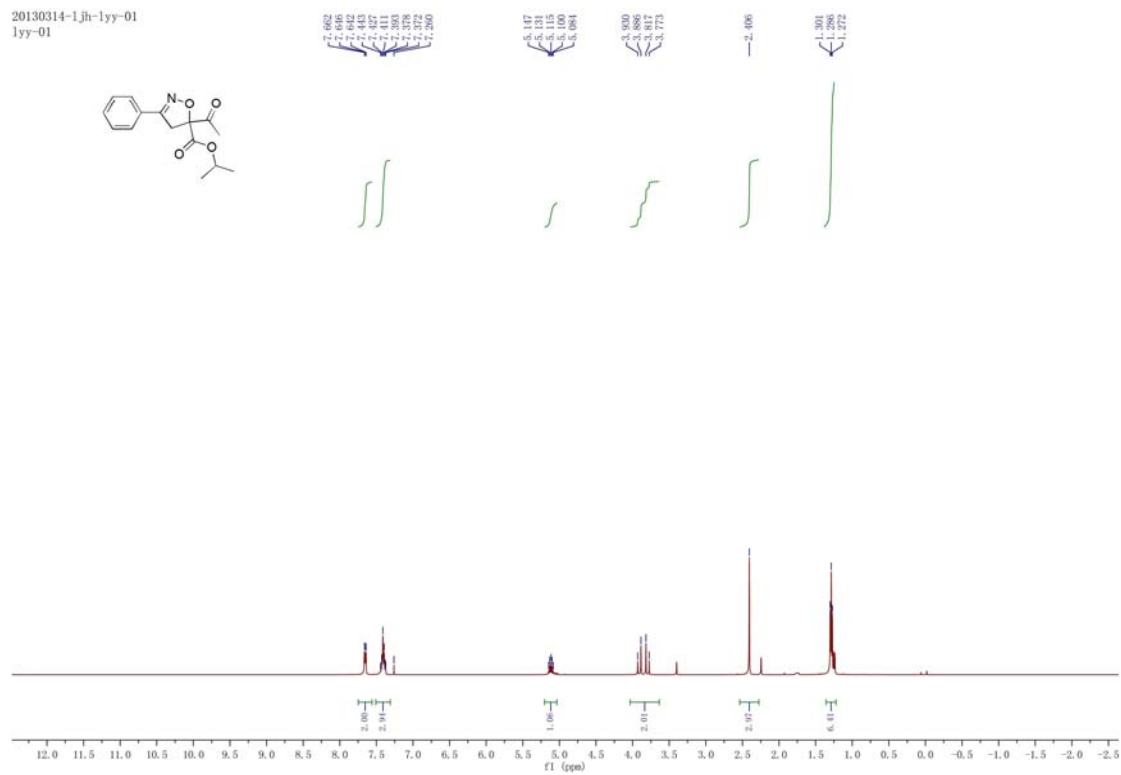

20130314-1.jh-lyy-01  
lyy-01

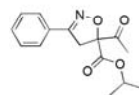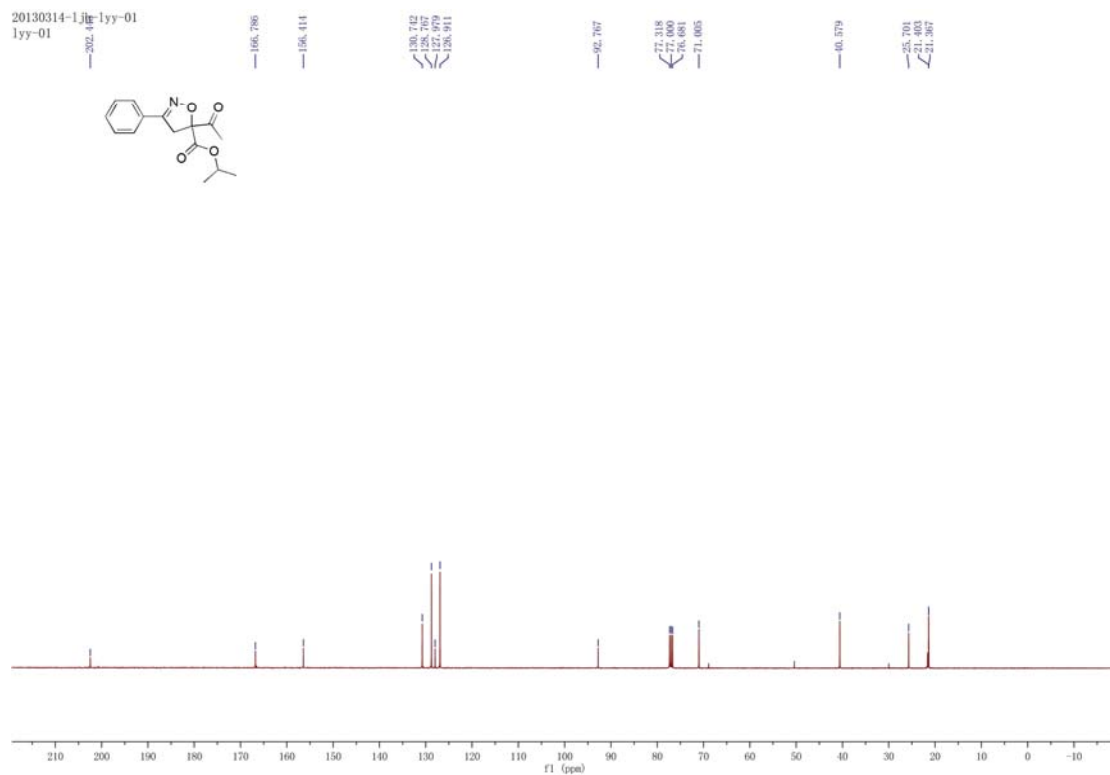

**5-acetyl-3-phenyl-4,5-dihydroisoxazole-5-carboxylic acid benzyl ester (3ai):**

20130523-LJH-LYY-1  
LYY-1

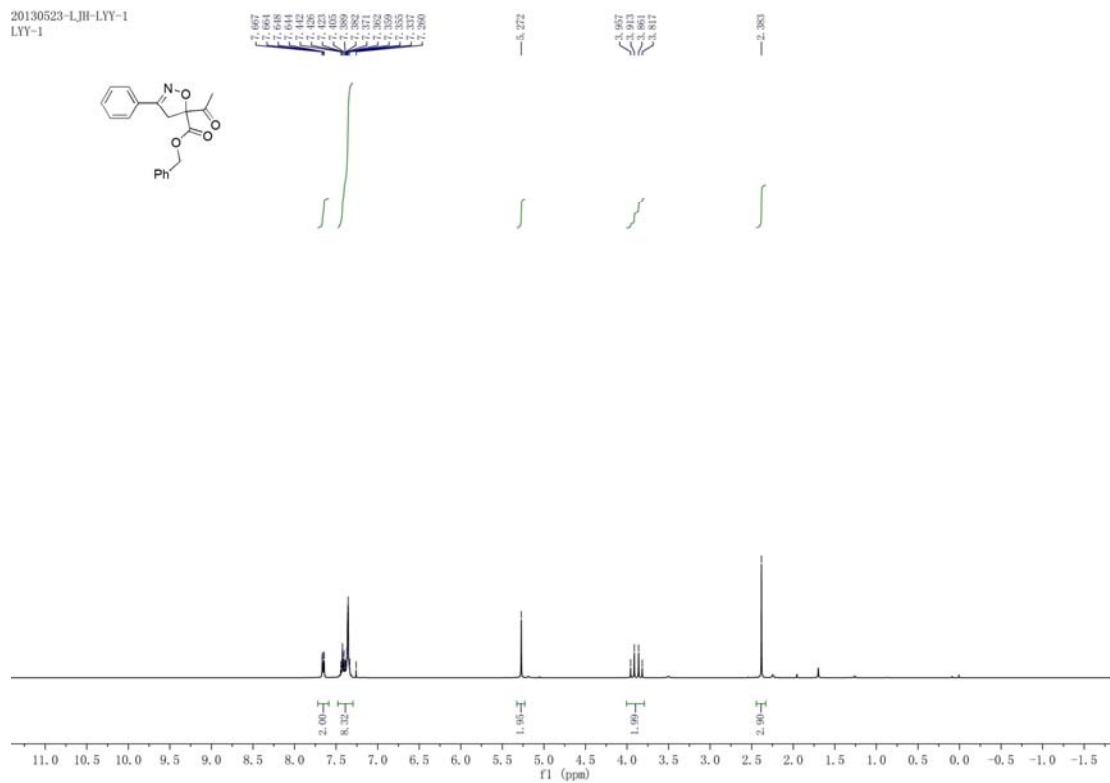

20130523-LJH-LYY-1  
LYY-1

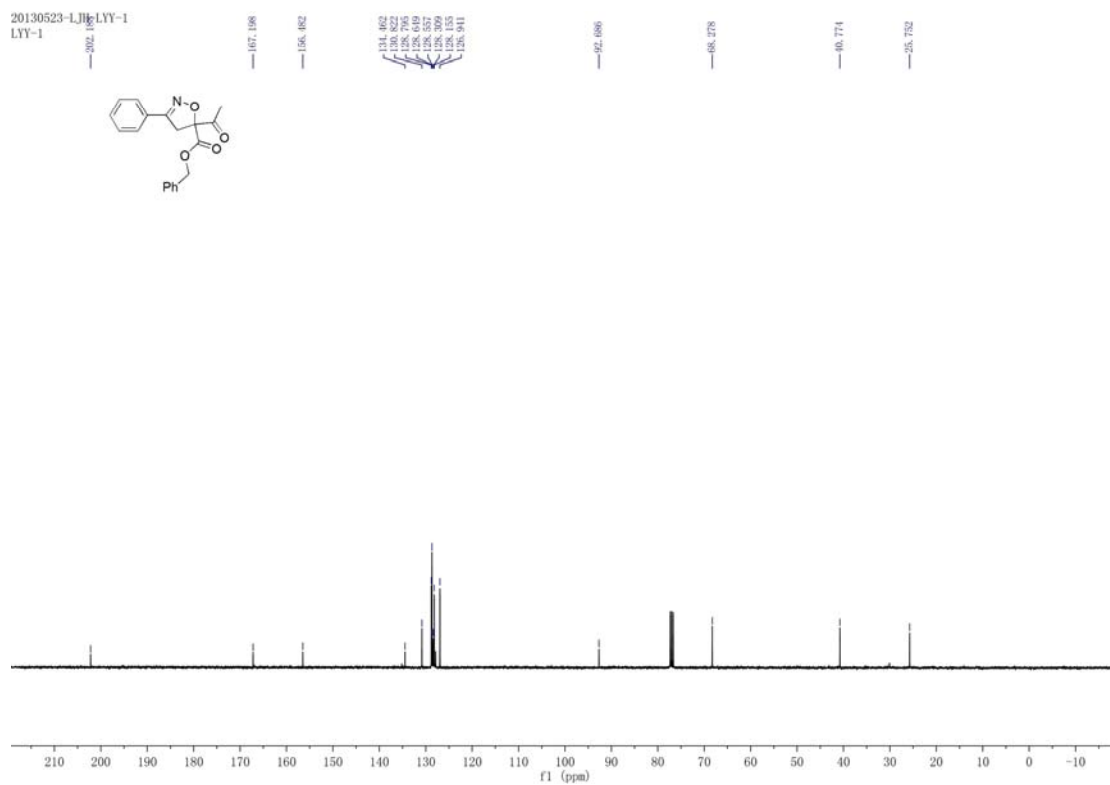





### 5-acetyl-3-phenyl-4,5-dihydroisoxazole-5-carboxylic acid allyl ester (3ak):

20130318-1jh-lyy-06  
lyy-06

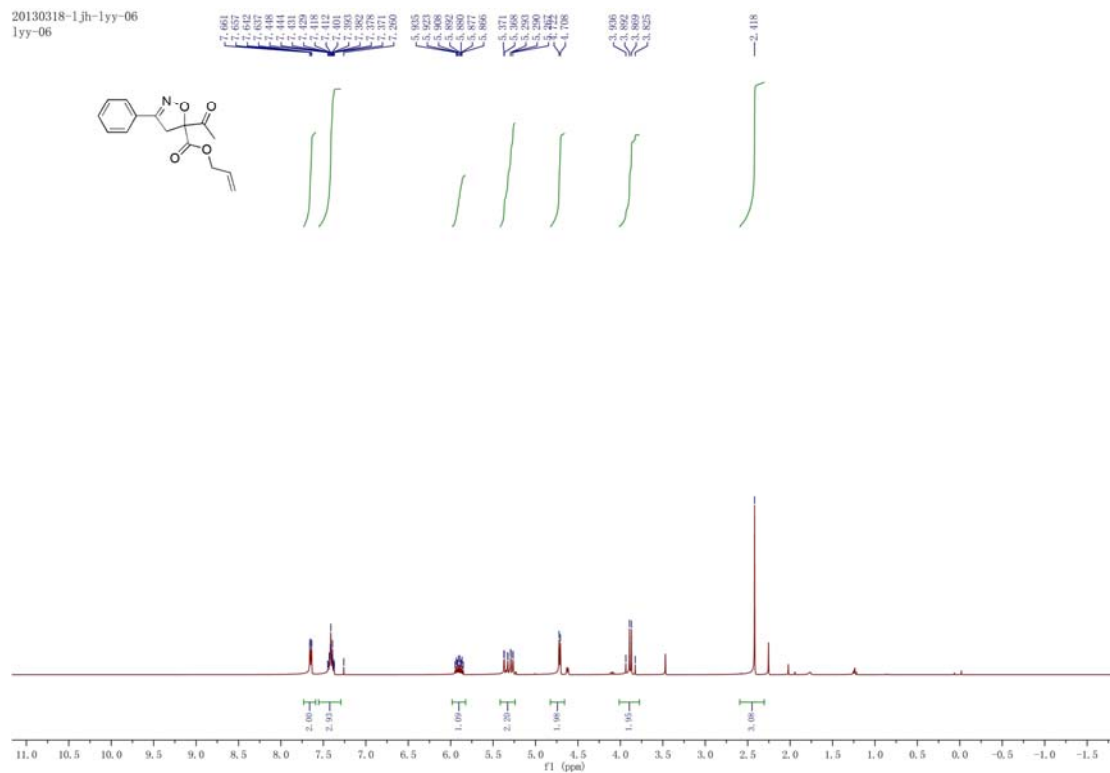

20130318-1jh-lyy-06  
lyy-06

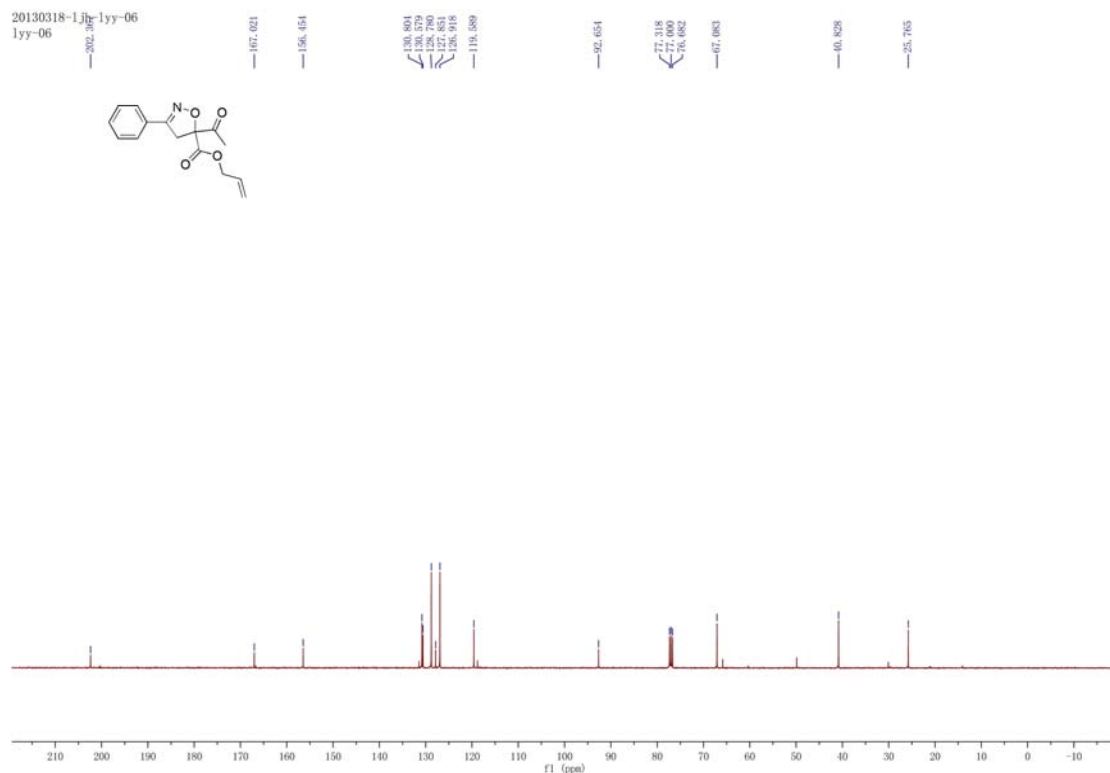

### 3-phenyl-5-propionyl-4,5-dihydroisoxazole-5-carboxylic acid methyl ester (3a1):

20130318-1jh-lyy-04  
lyy-04

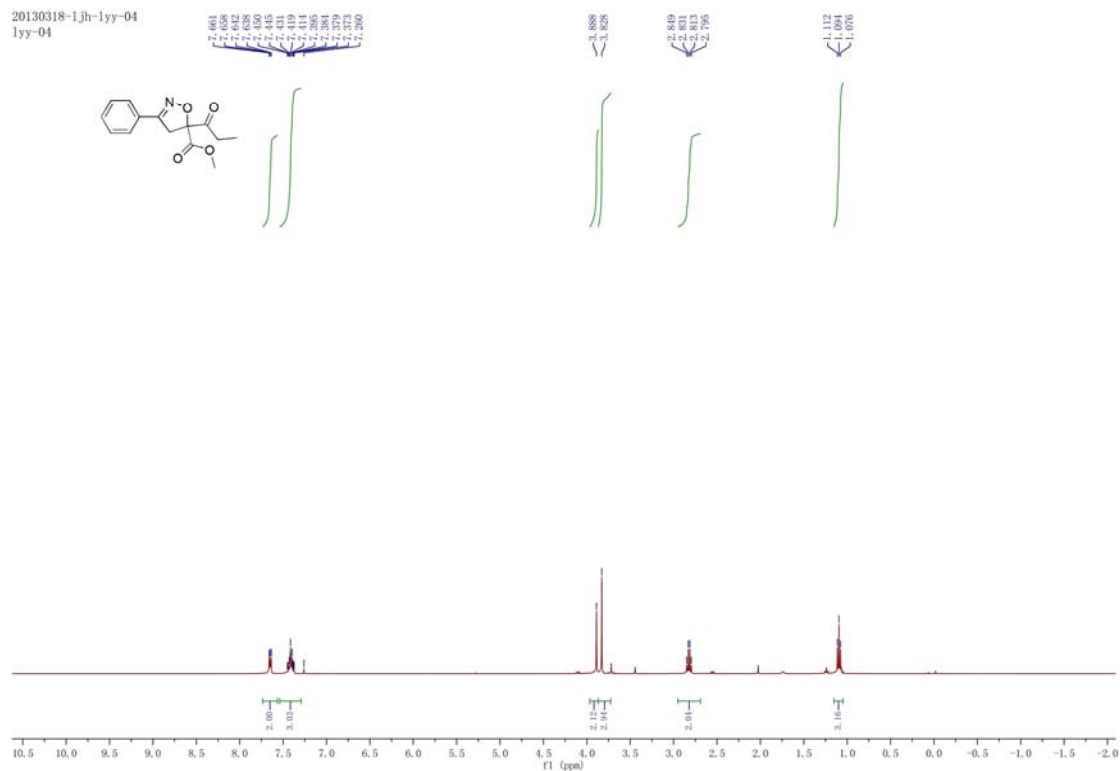

20130318-1jh-lyy-04  
lyy-04

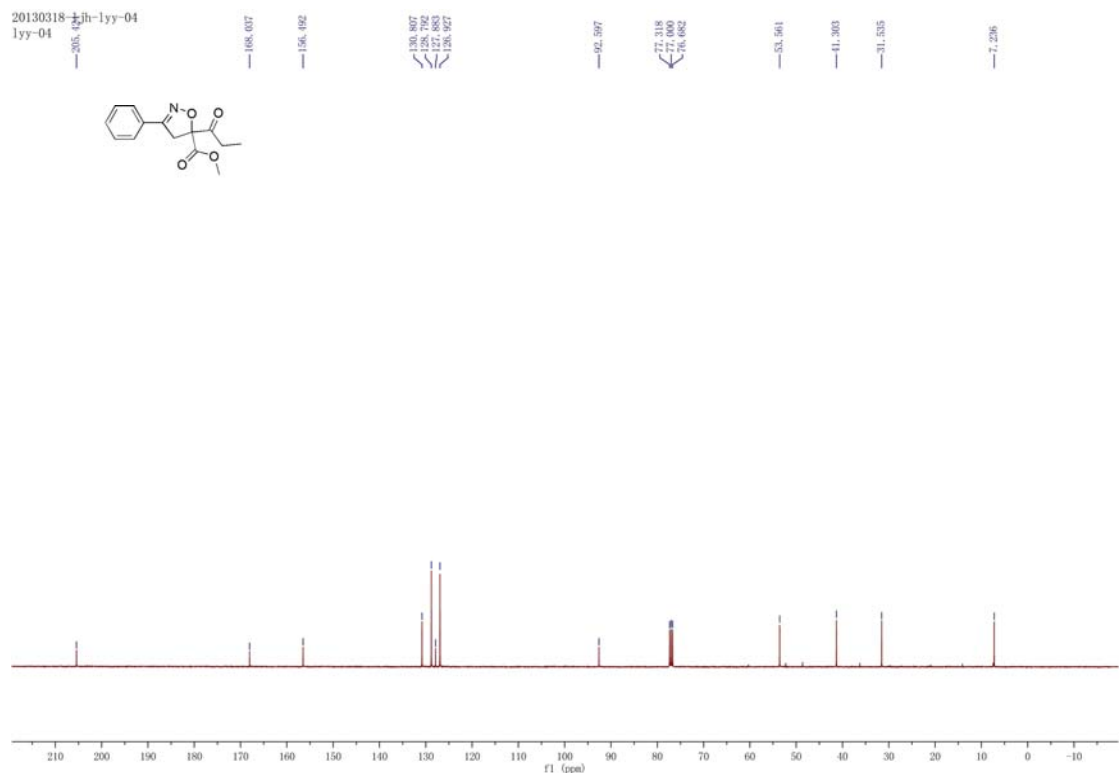

### 5-butyryl-3-phenyl-4,5-dihydroisoxazole-5-carboxylic acid ethyl ester (3am):

20130318-1jh-lyy-05  
lyy-05

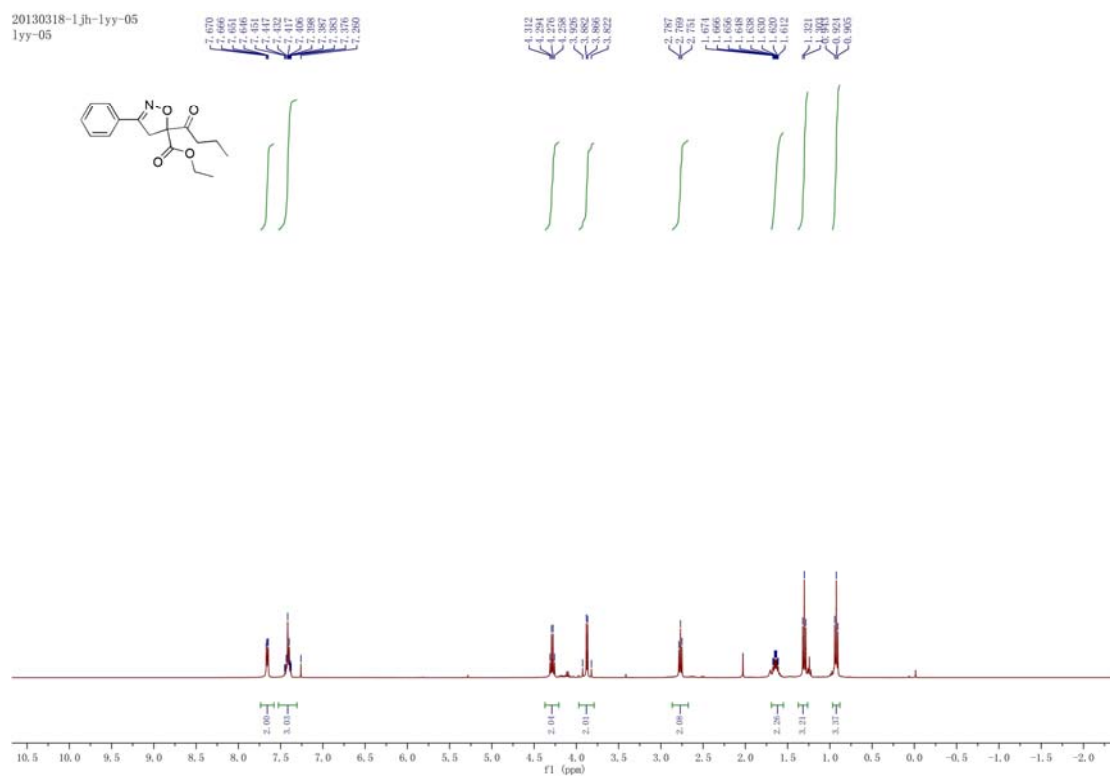

20130318-1jh-lyy-05  
lyy-05

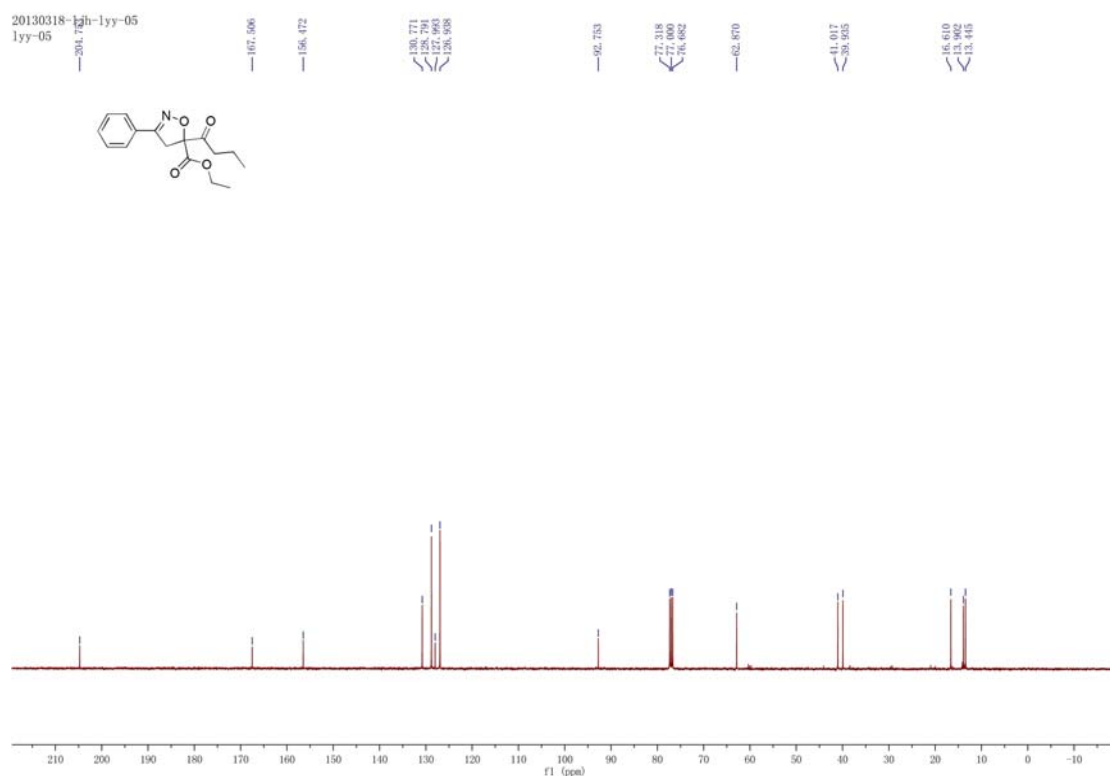

### 5-isobutyryl-3-phenyl-4,5-dihydroisoxazole-5-carboxylic acid methyl ester (3an):

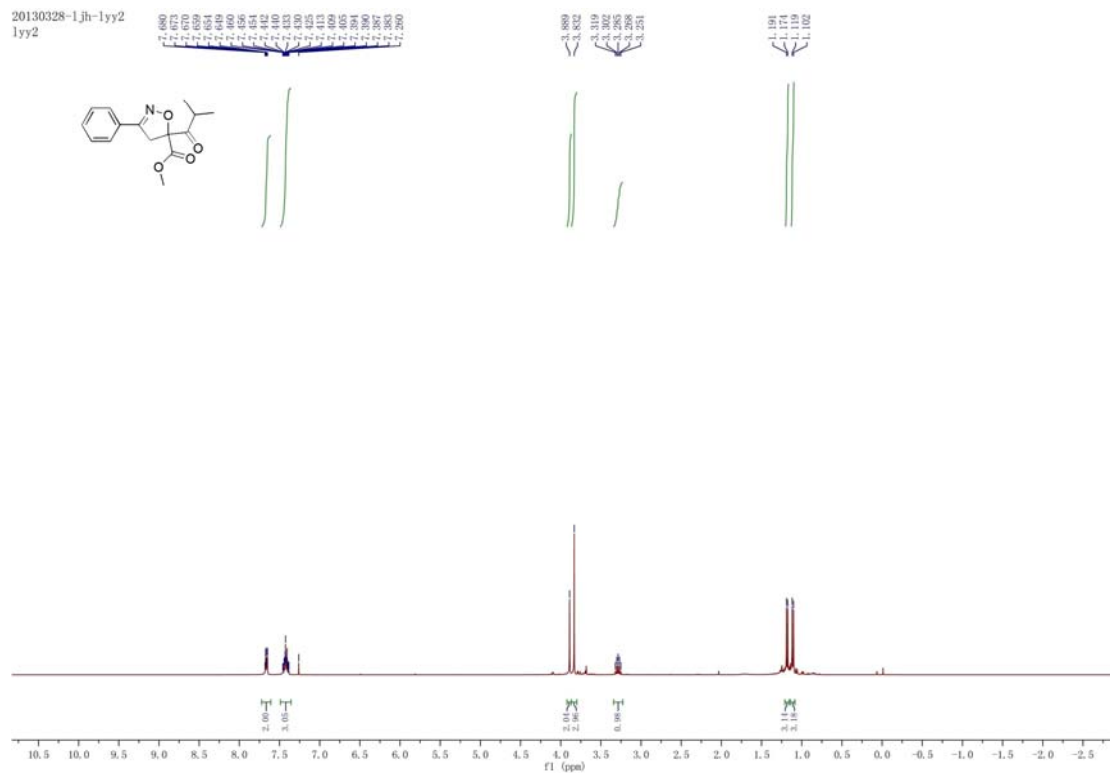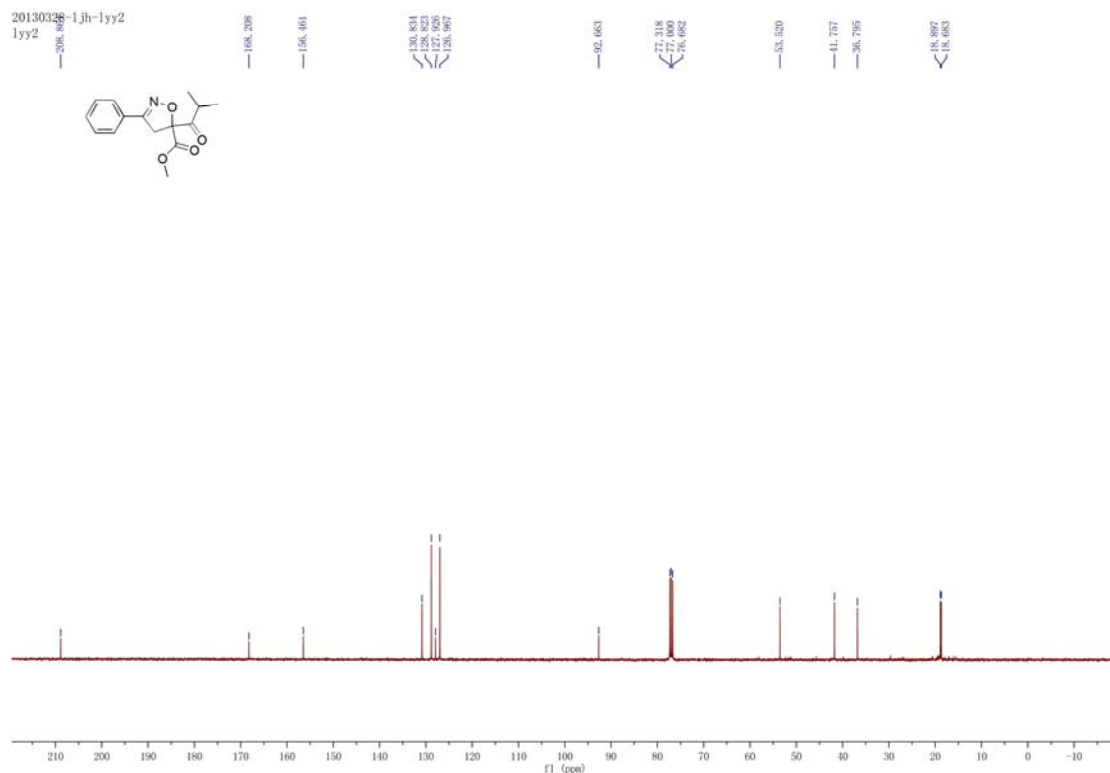

### 5-benzoyl-3-phenyl-4,5-dihydroisoxazole-5-carboxylic acid ethyl ester (3ao):

20130406-1jh-1yy-07  
lyu-07

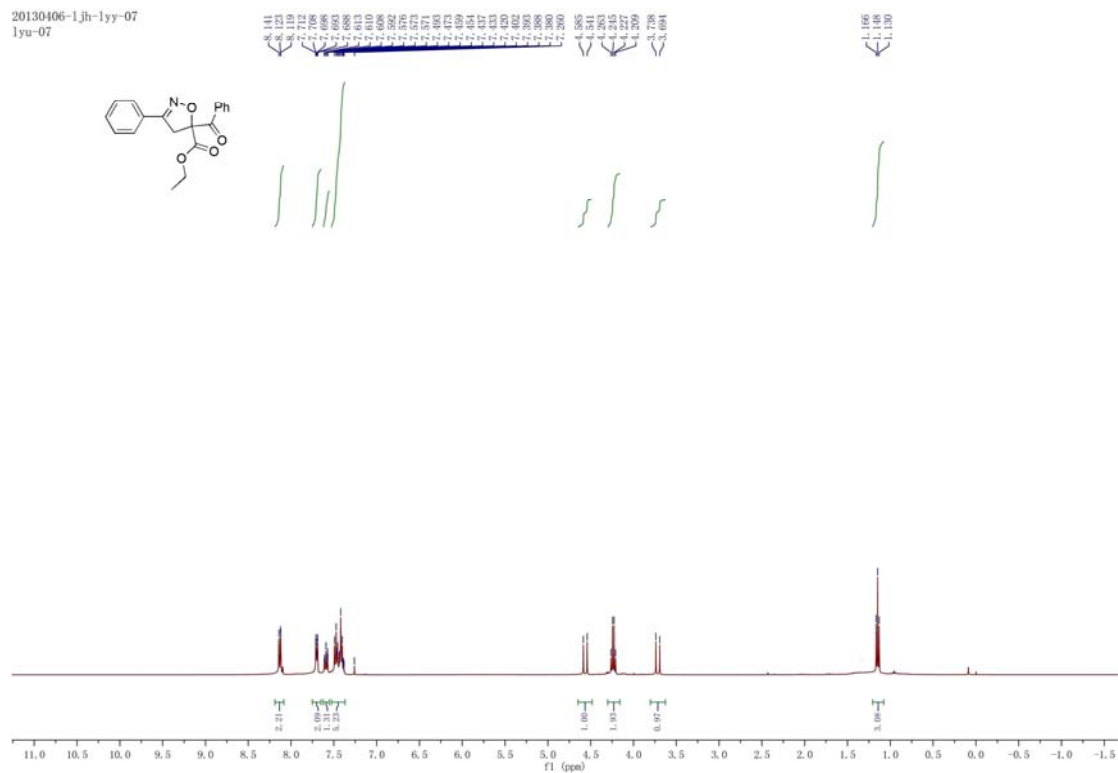

20130406-1jh-1yy-07  
lyu-07

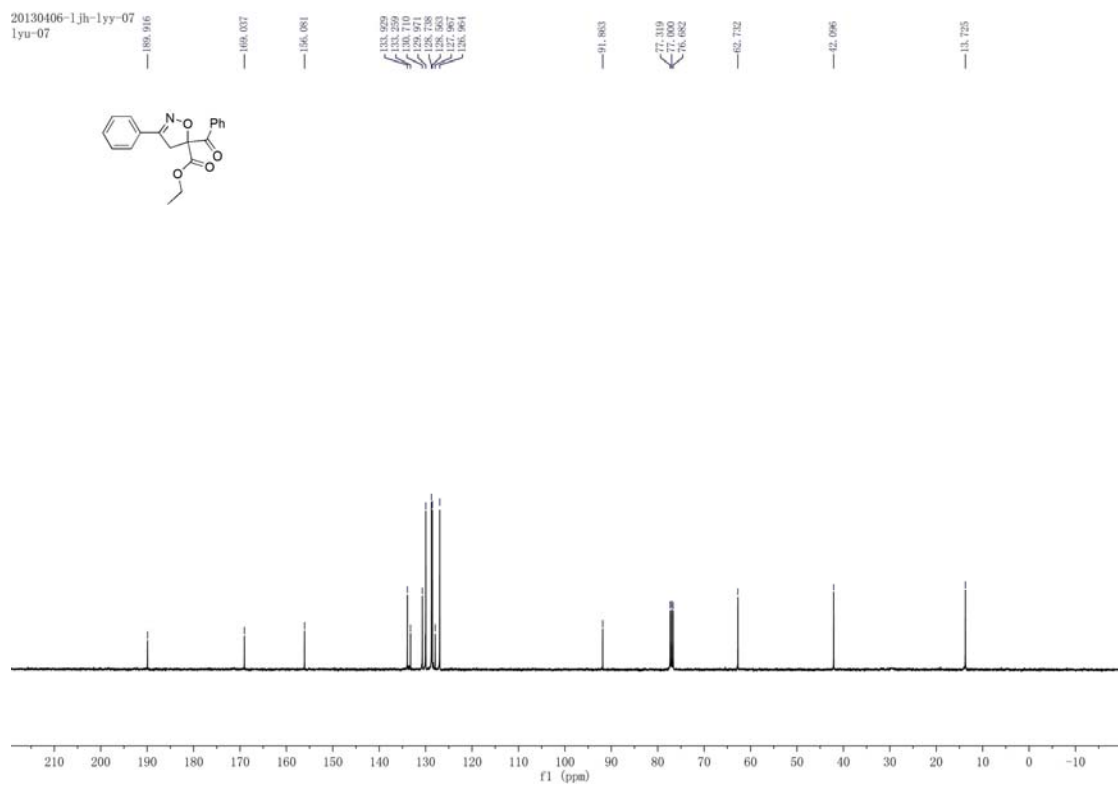

**5-acetyl-N,3-diphenyl-4,5-dihydroisoxazole-5-carboxamide (3ap):**

20130318-1jh-lyy-07  
lyy-07

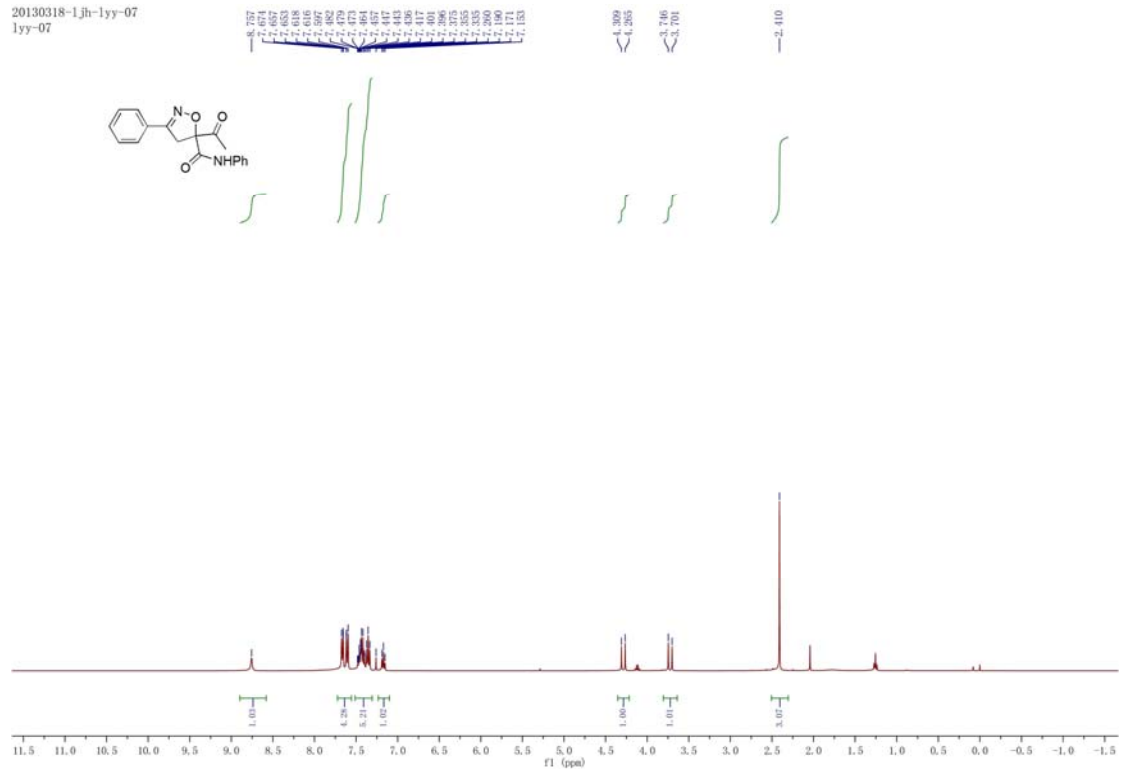

20130318-1jh-lyy-07  
lyy-07

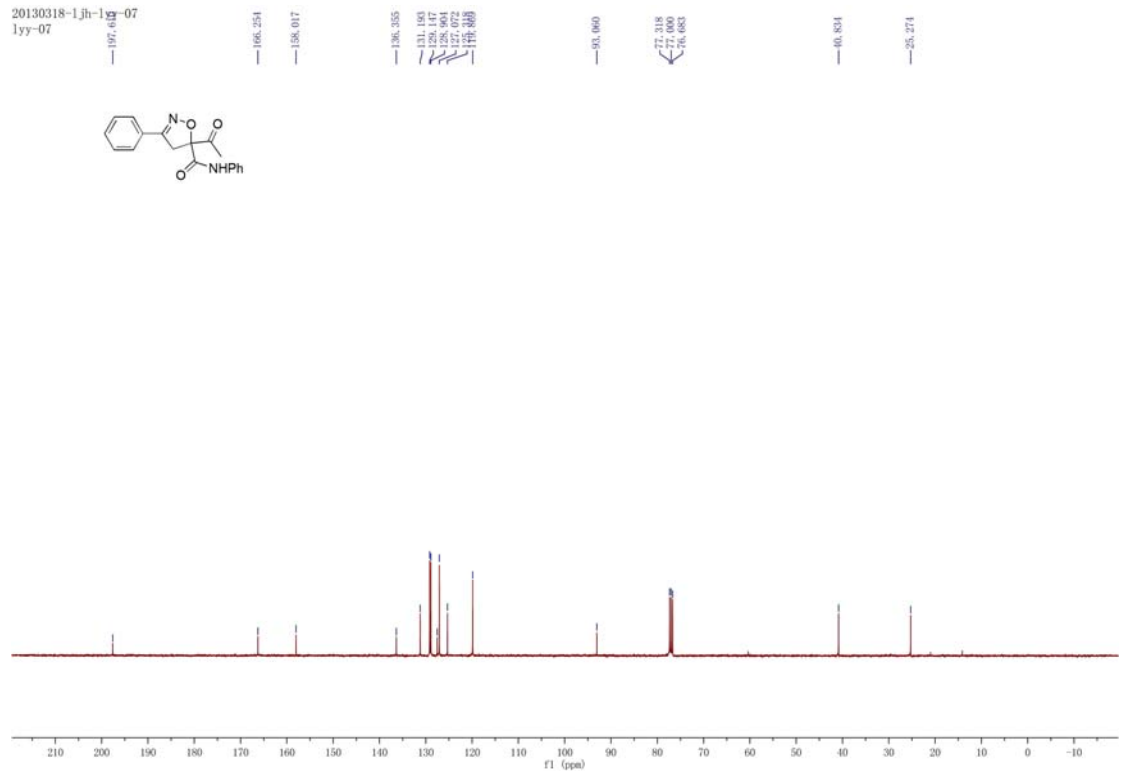

# 1,1'-(3-*p*-tolyl-4,5-dihydroisoxazole-5,5-diyl)diethanone (3ca):

20130406-1jh-lyy-08  
lyu-08

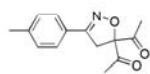

7.585  
7.590  
7.217  
7.200

3.734

2.309  
2.306

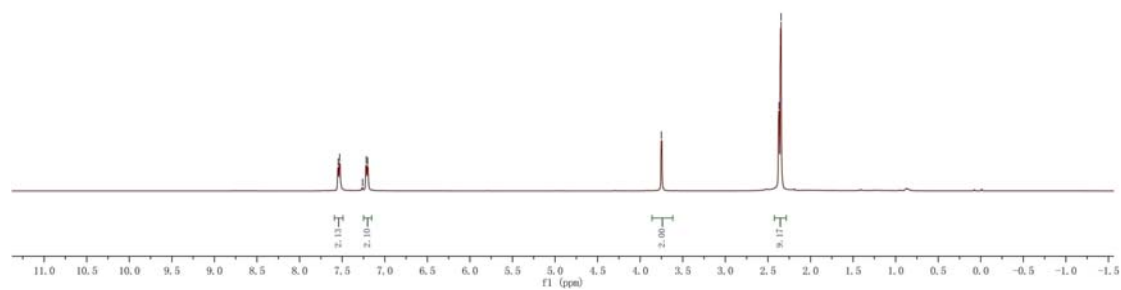

20130406-1jh-lyy-08  
lyu-08

202.171

156.995

141.322

128.811

124.900

97.308

77.518  
77.000  
76.682

40.172

25.739

21.390

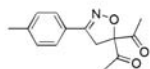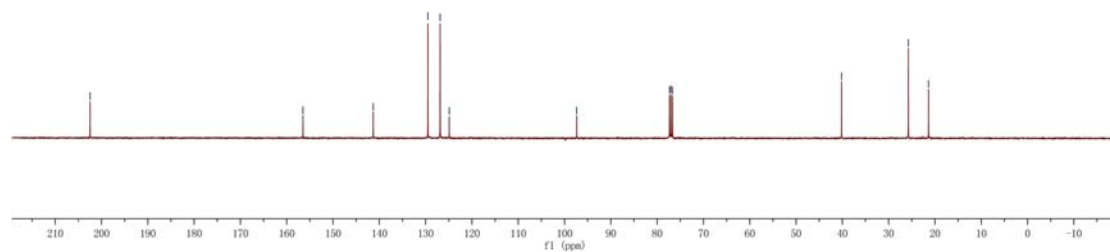

# 1,1'-(3-(4-methoxyphenyl)-4,5-dihydroisoxazole-5,5-diy)diethanone (3da):

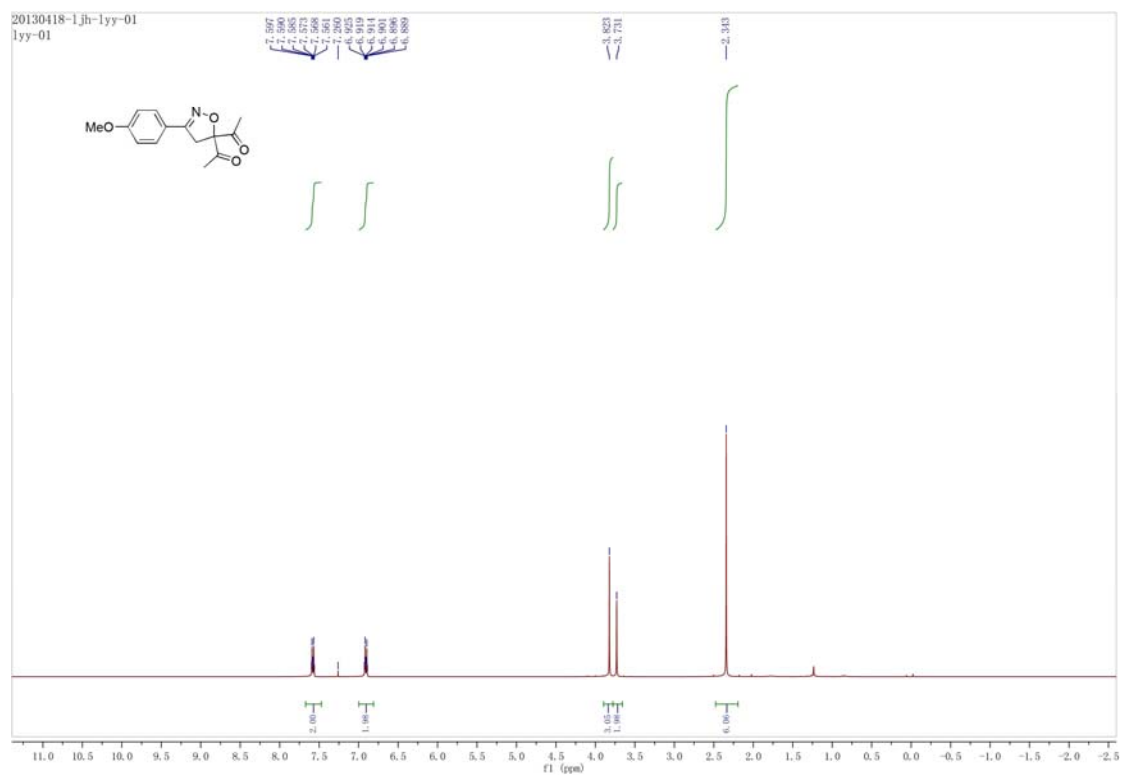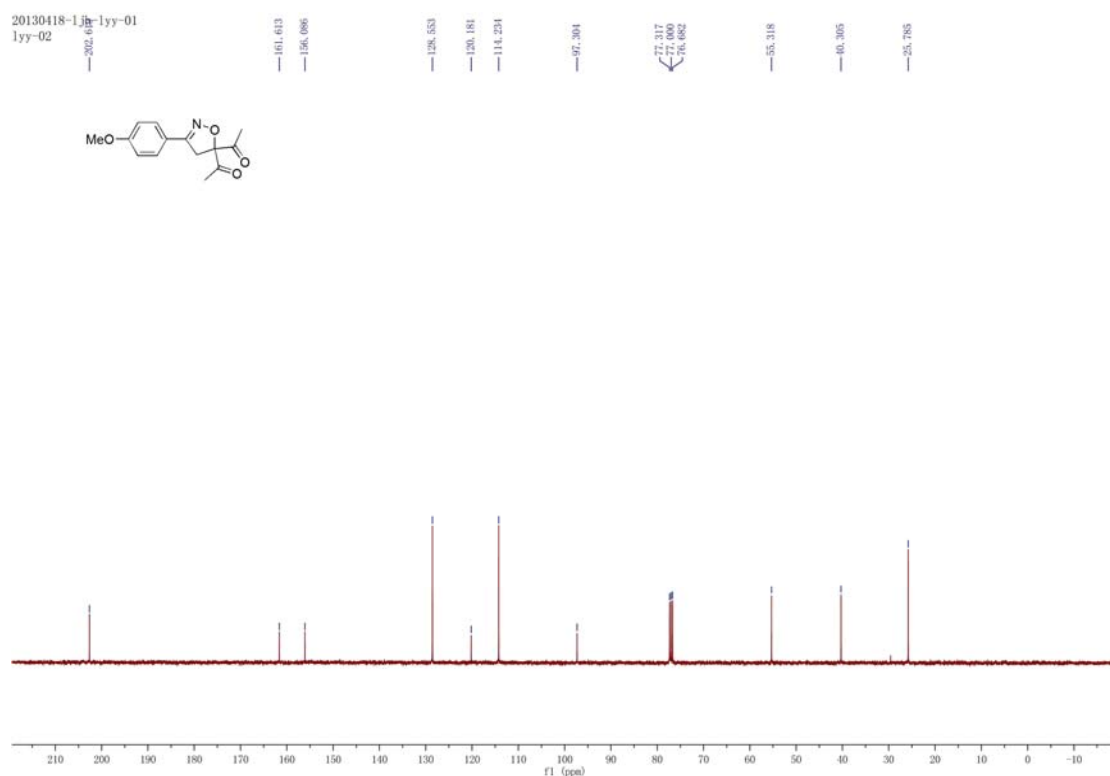



# 1,1'-(3-(4-chlorophenyl)-4,5-dihydroisoxazole-5,5-diyl)diethanone (3ea):

20130418-1jh-lyy-02  
lyy-02

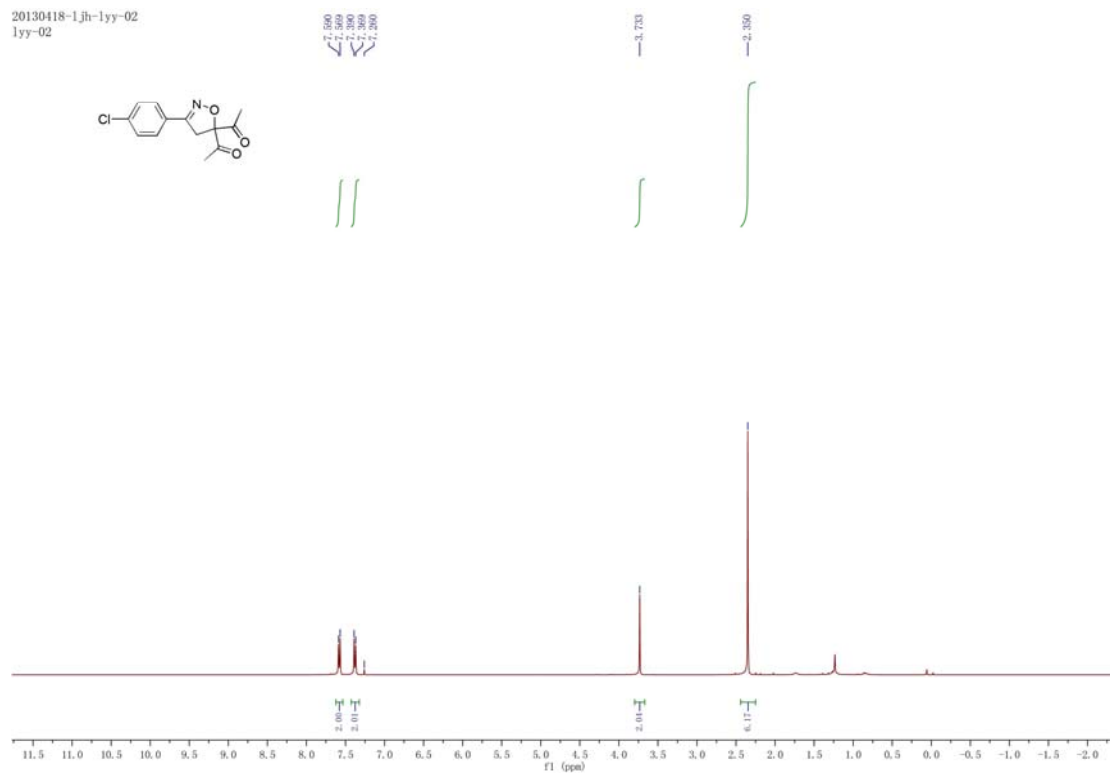

20130418-1jh-lyy-02  
lyy-02

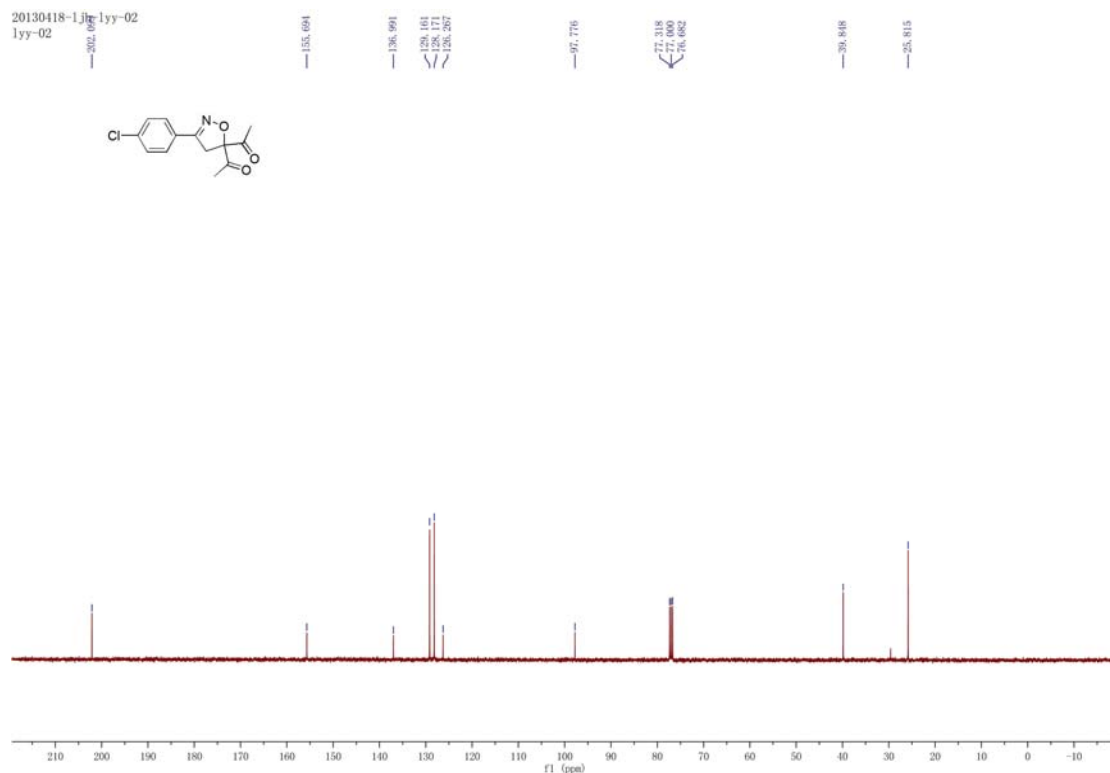

# 1,1'-(3-(4-bromophenyl)-4,5-dihydroisoxazole-5,5-diyl)diethanone (3fa):

20130425-1jh-lyy-01  
lyy-01

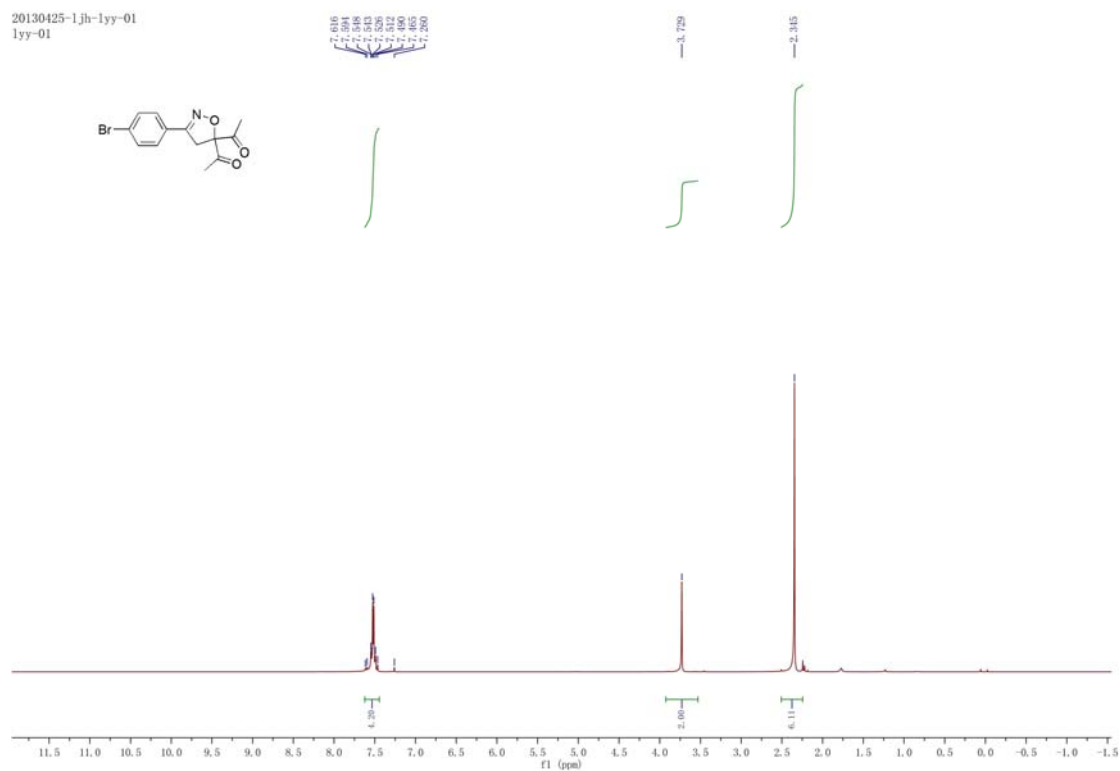

20130425-1jg-lyy-01  
lyy-01

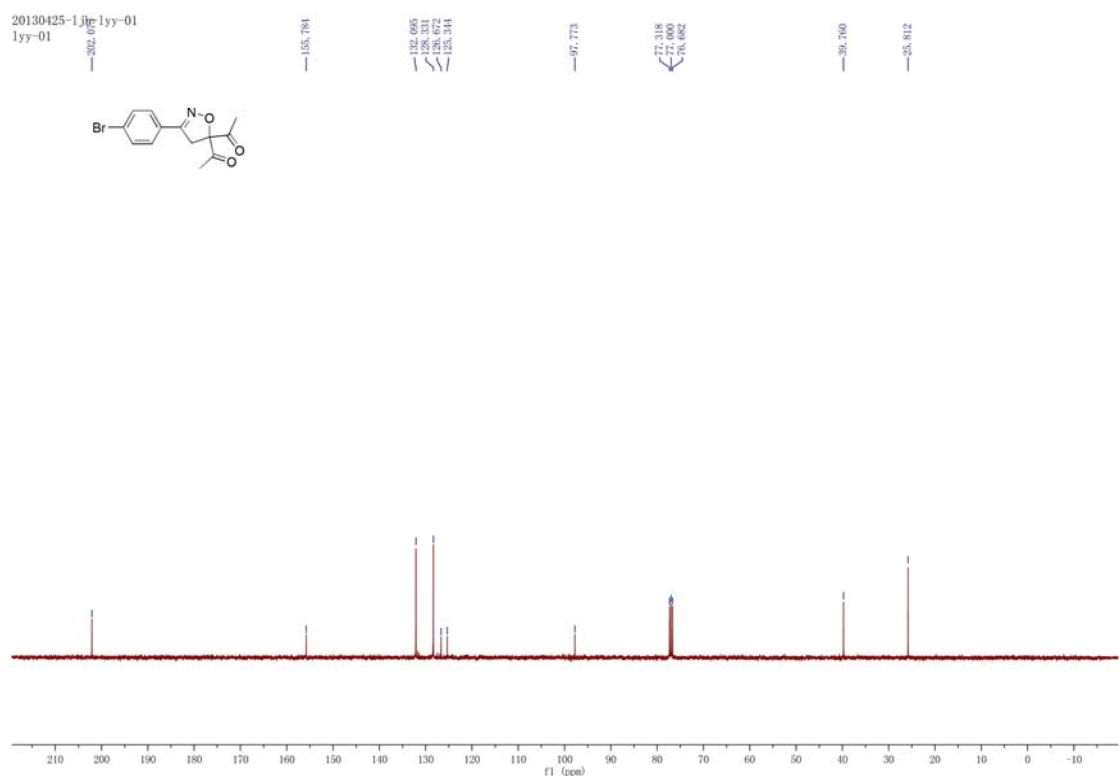

**4-(5,5-diacetyl-4,5-dihydroisoxazol-3-yl)benzonitrile (3ga):**

20130418-1.jh-lyy-04  
lyy-04

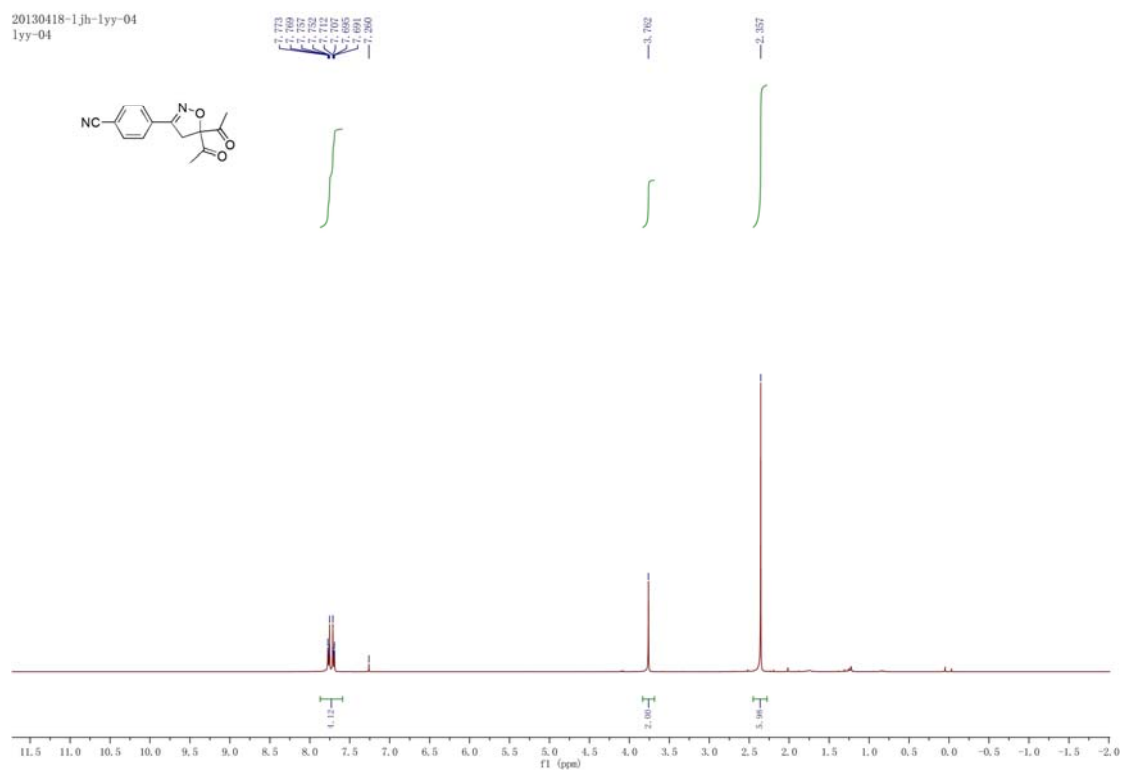

20130418-1.jh-lyy-04  
lyy-04

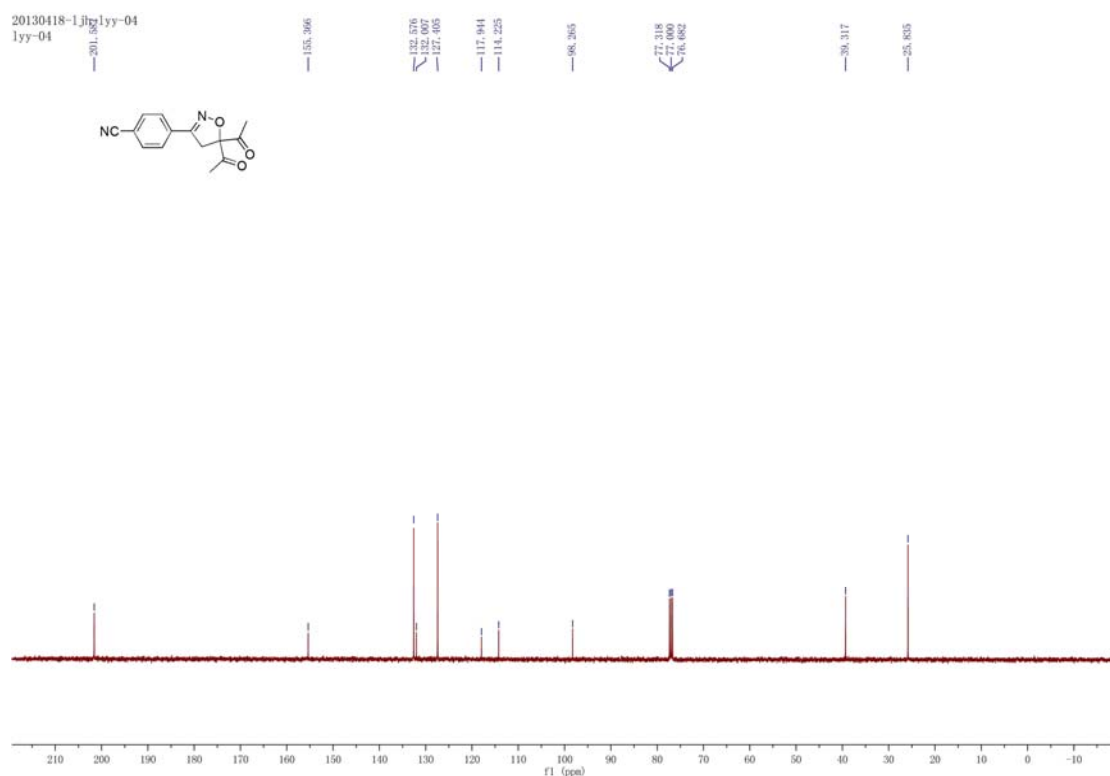

# 1,1'-(3-(4-nitrophenyl)-4,5-dihydroisoxazole-5,5-diyl)diethanone (3ha):

20130418-1jh-lyy-03  
lyy-03

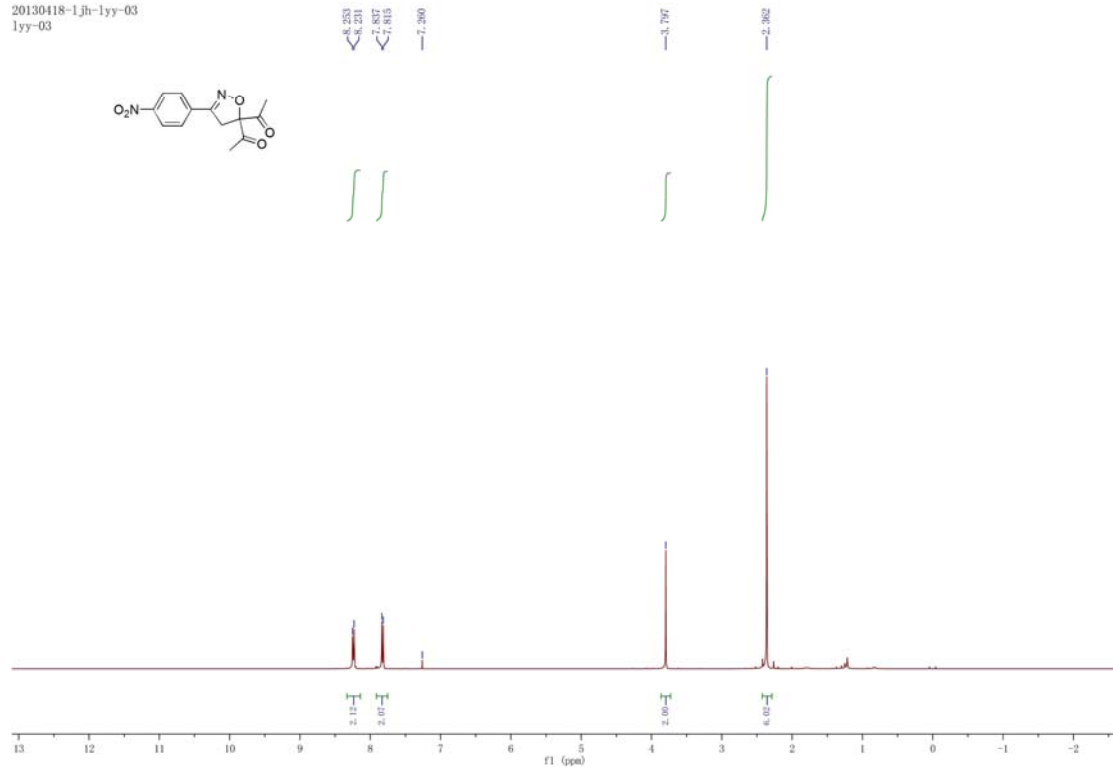

20130418-1jh-lyy-03  
lyy-03

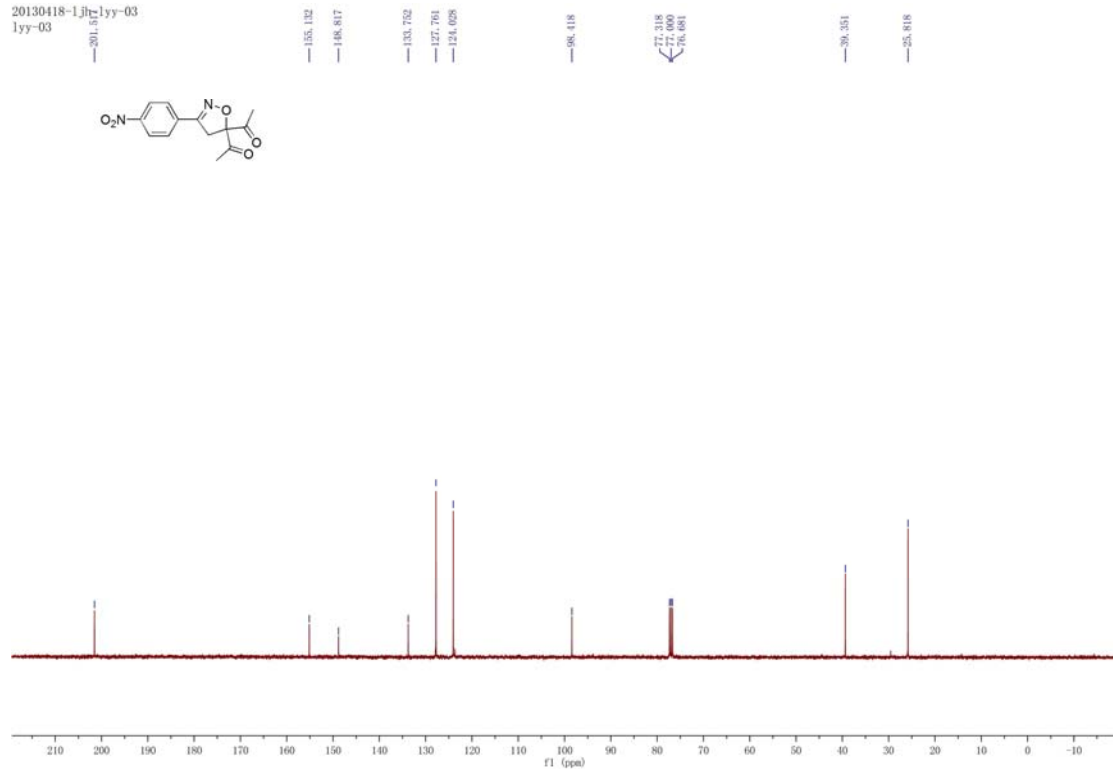

**1,1'-(3-(thiophen-3-yl)-4,5-dihydroisoxazole-5,5-diyl)diethanone (3ia):**

20130901-1jh-lyy-1  
lyy

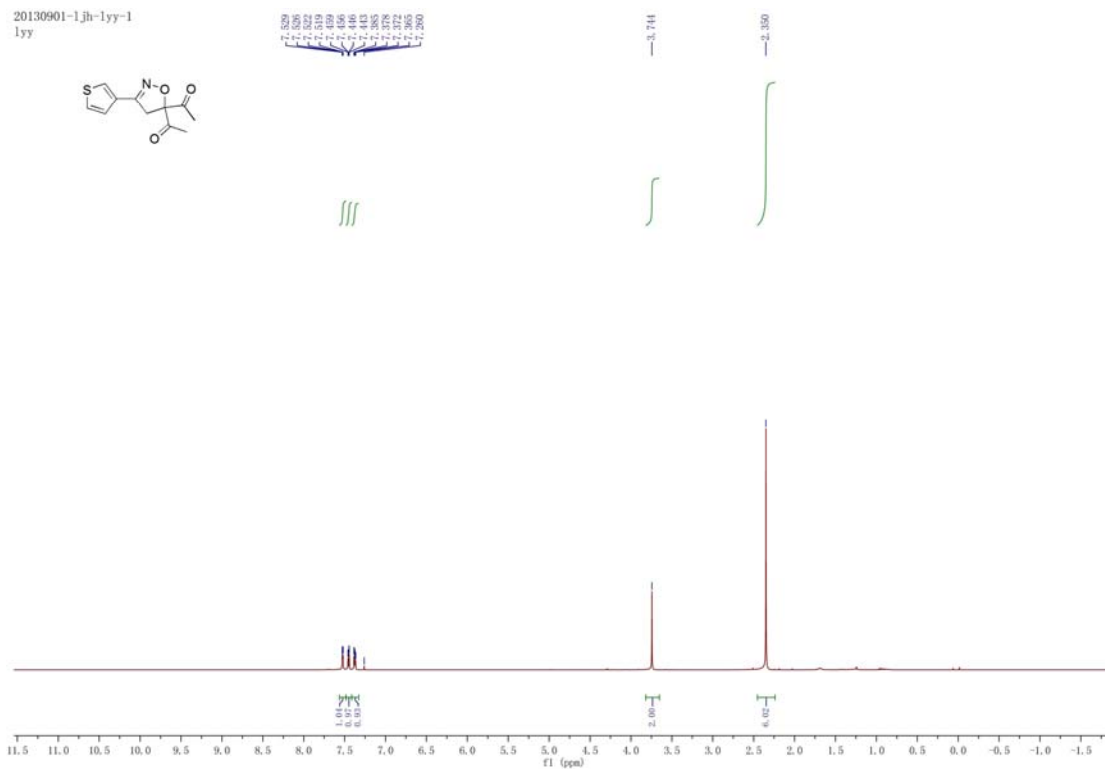

20130901-1jh-lyy-1  
lyy

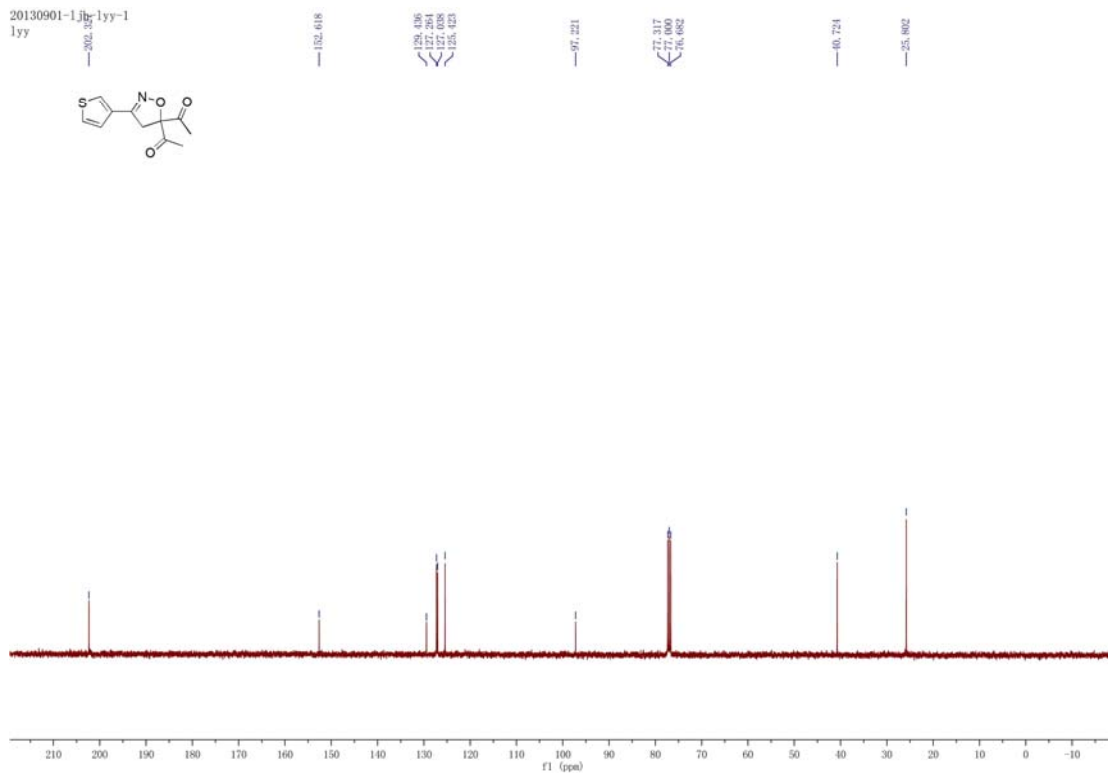

**(E)-5-(acetoxyimino)-5-phenylpentan-2-one (4aa):**

20121225-1jh-lyy  
lyy

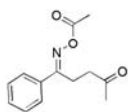

7.682  
7.681  
7.664  
7.653  
7.411  
7.392  
7.390

3.188  
3.186  
3.068  
3.066  
2.458  
2.456  
2.110  
2.108

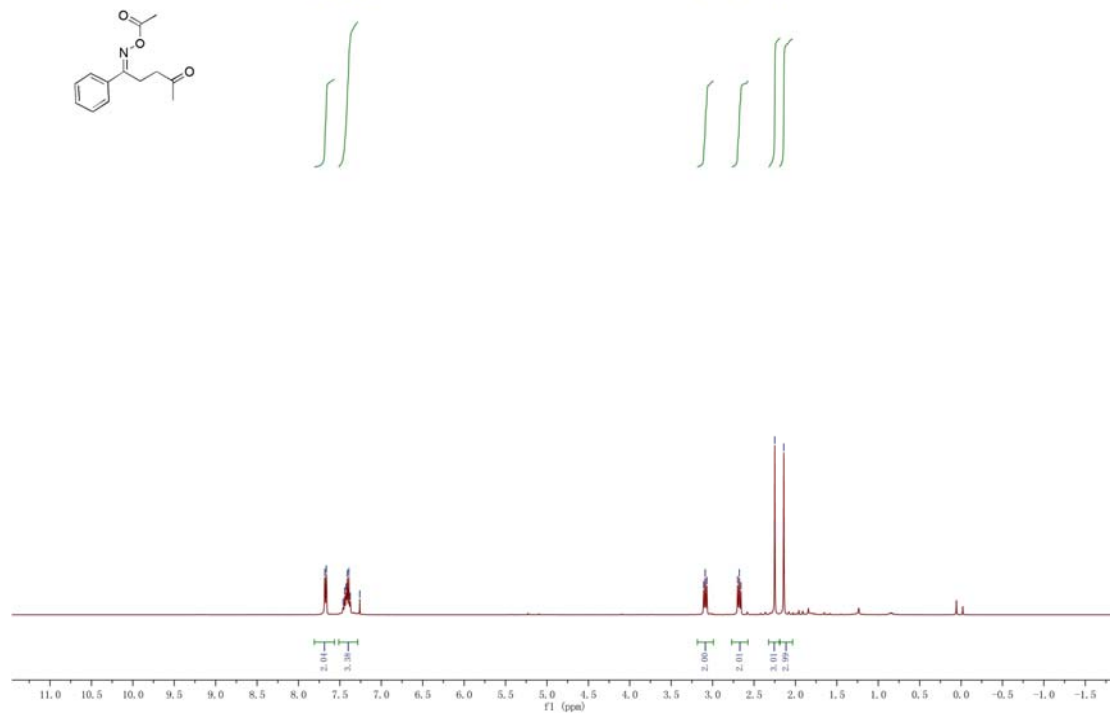

20121225-1jh-lyy  
lyy

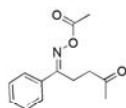

168.878  
168.253

131.928  
130.717  
128.703  
127.197

77.318  
77.000  
76.682

39.746  
29.753  
22.124  
18.816

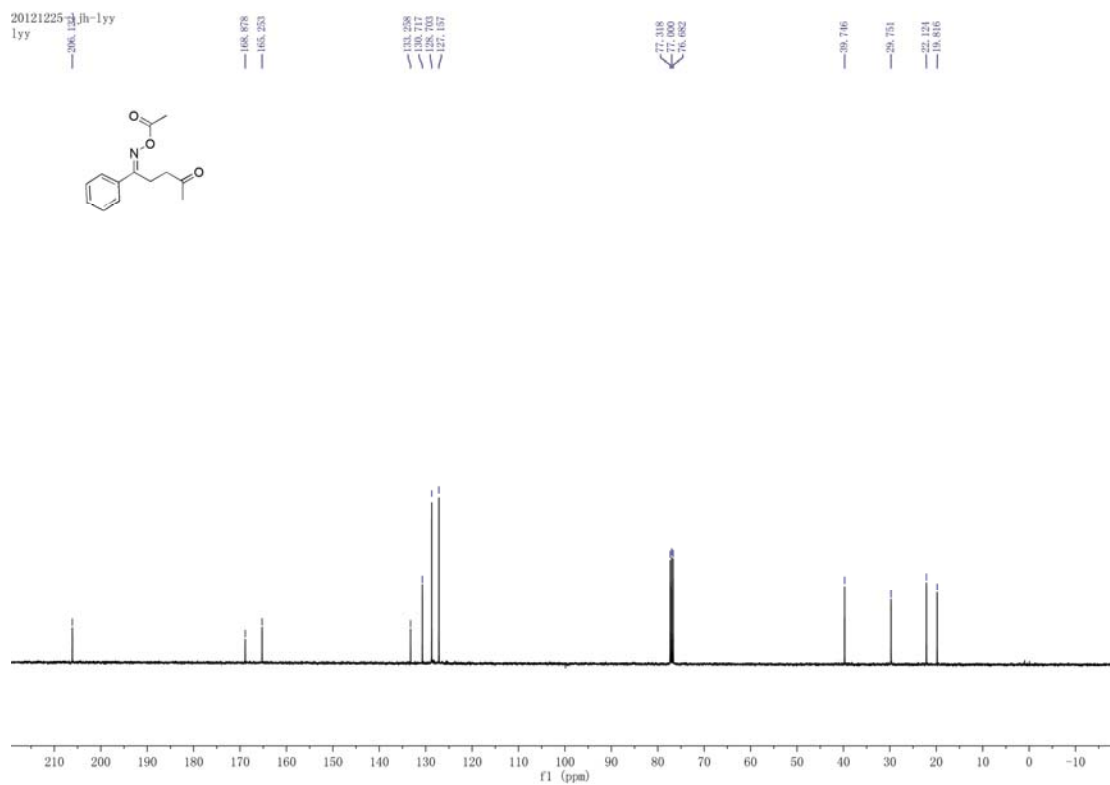

**(E)-4-(benzoyloxyimino)-1,4-diphenylbutan-1-one (4ac):**

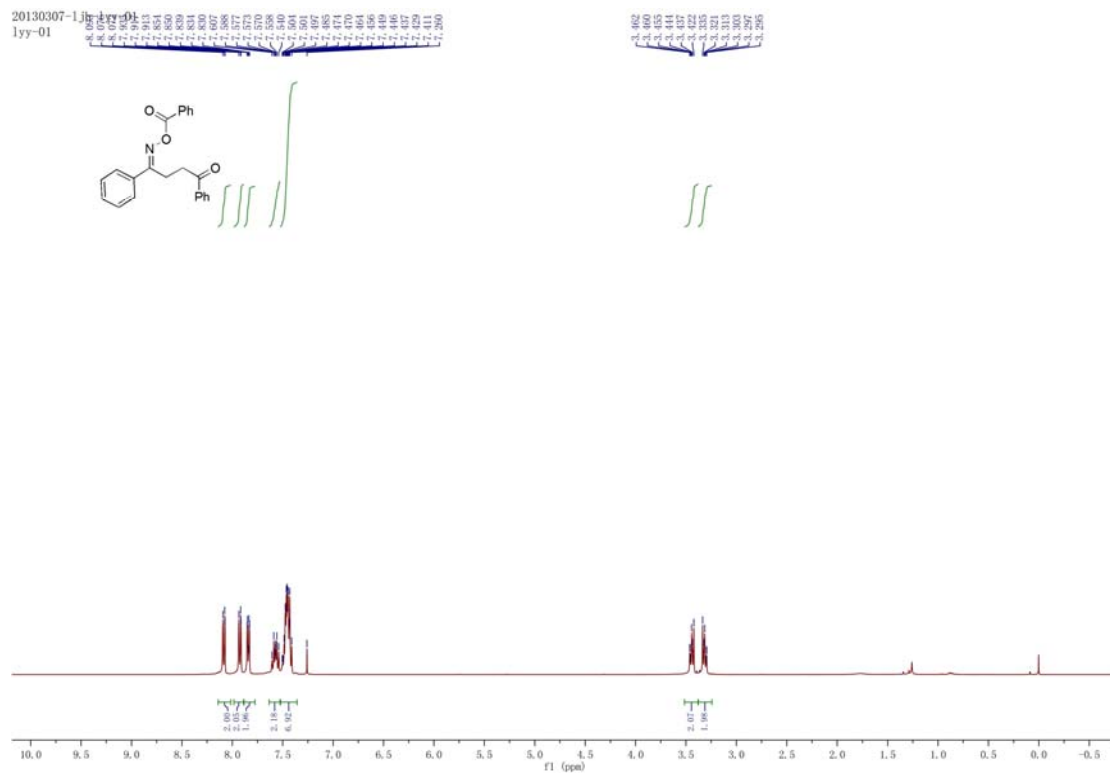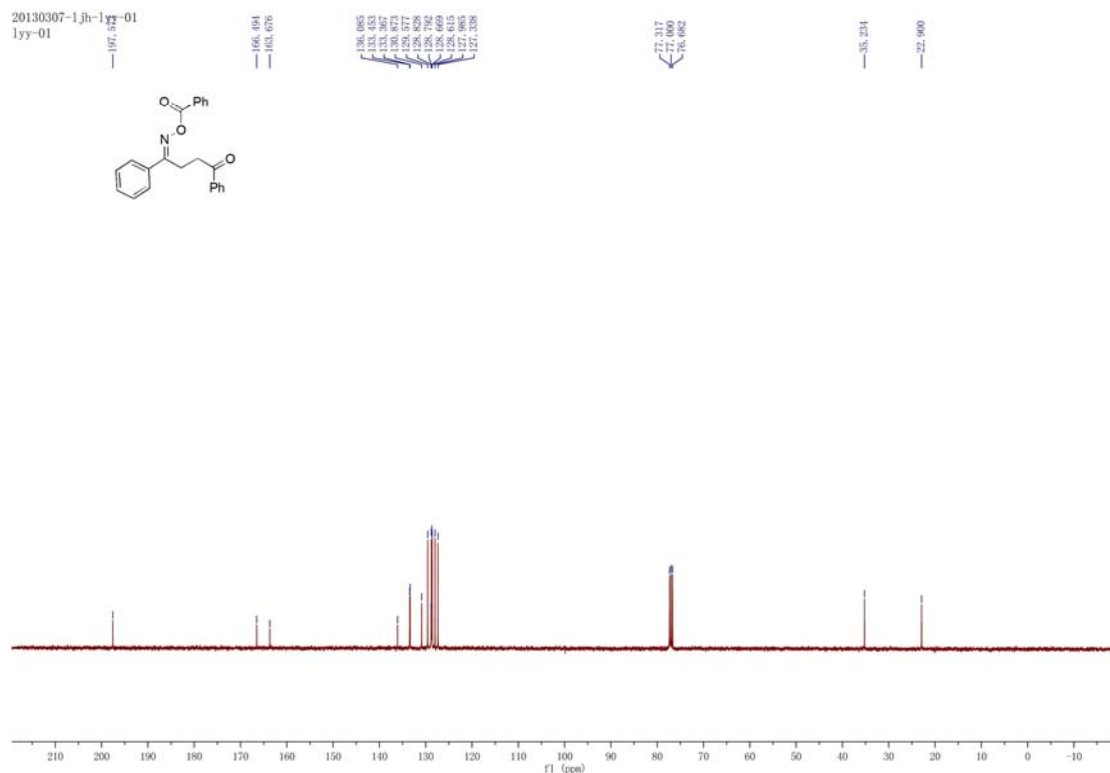

**(E)-4-(acetoxyimino)-1,4-diphenylbutan-1-one (4ad):**

20121227-1.jh-lyy-01  
lyy-01

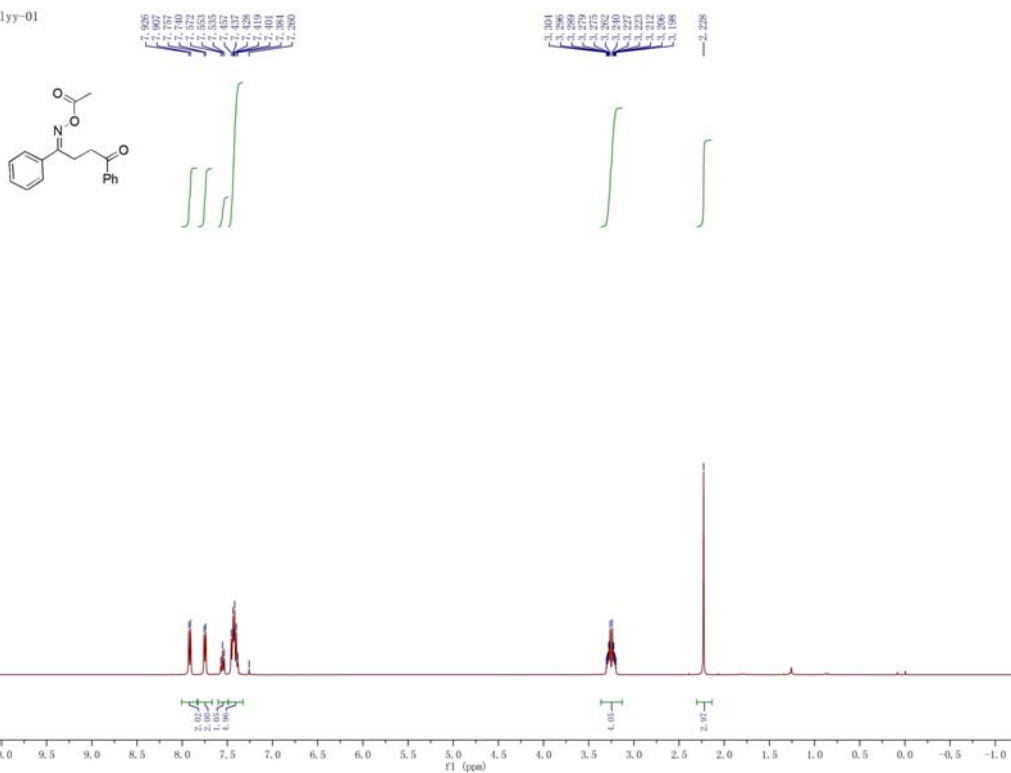

20121227-1.jh-lyy-01  
lyy-01

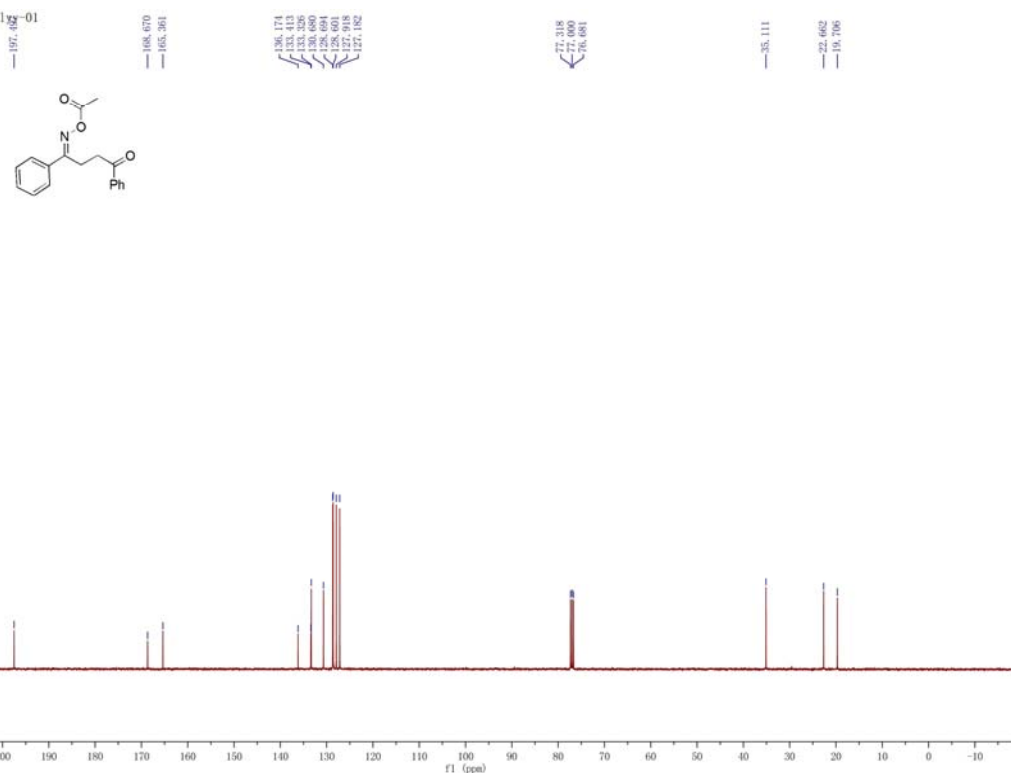



**(E)-ethyl 2-benzoyl-4-(hydroxyimino)-4-phenylbutanoate (5a0):**

20130926-1\_jh-1yy-02  
1yy-02

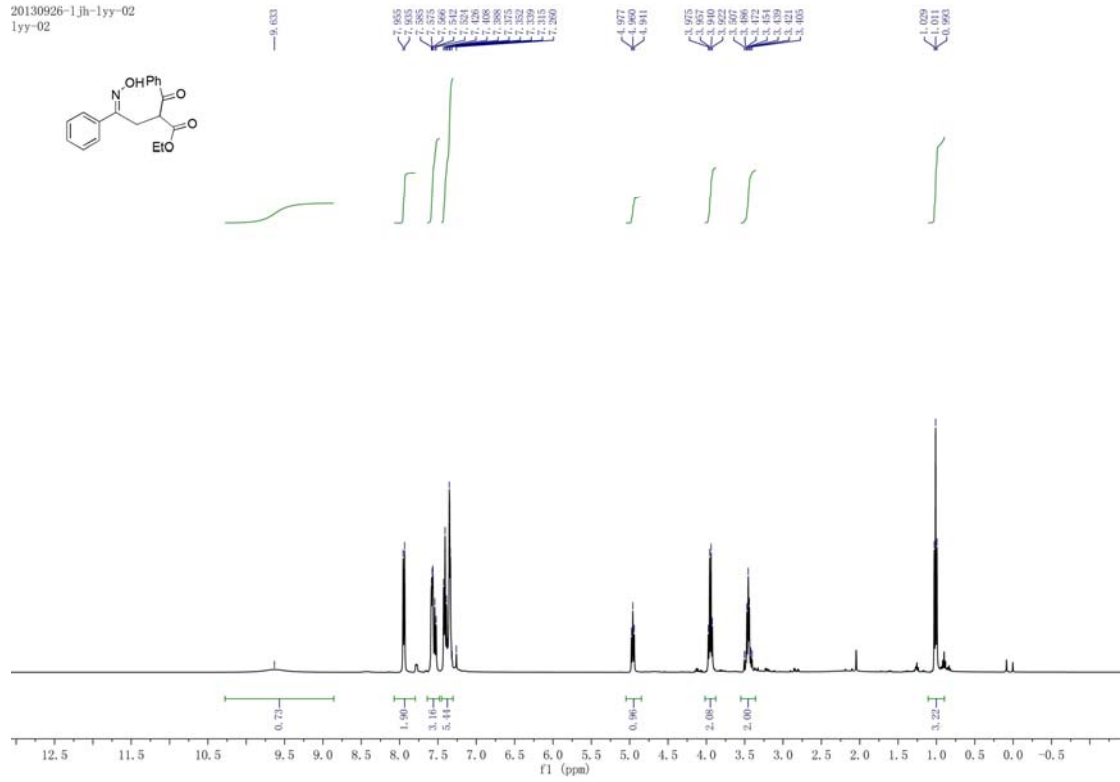

20130926-1\_jh-1yy-02  
1yy-02

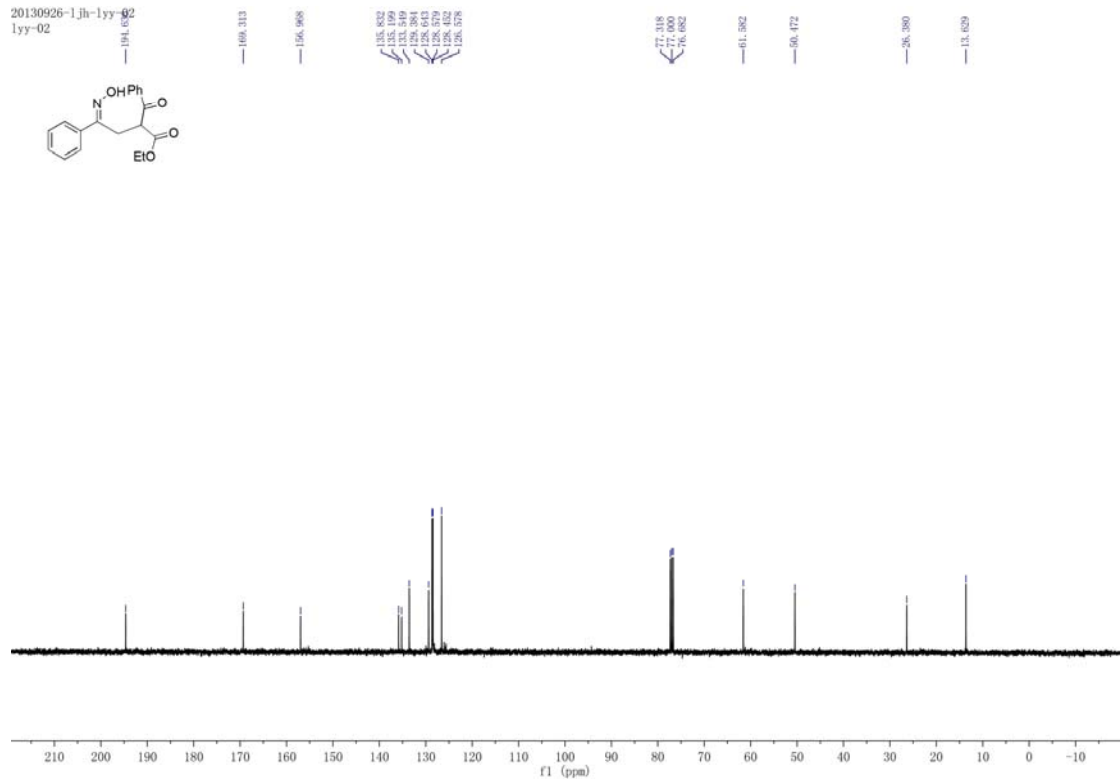

Supplement: c4cc02084g1.pdf [file c4cc02084g1.pdf]
